# Supplementary material for: Developmental pattern of aquaporin expression in barley (Hordeum vulgare L.) leaves
Source: PubMed Central journal article supplement — J Exp Bot. 2011 Jul 6;62(12):4127–42. doi: 10.1093/jxb/err175 (PMC3153690; doi:10.1093/jxb/err175), 2011-07-06
Supplement: supp_err175_00058099-file001.pdf [file supp_err175_00058099-file001.pdf]

# Developmental pattern of aquaporin expression in barley (*Hordeum vulgare* L.) leaves

Matthieu Besse, Thorsten Knipfer, Anthony J. Miller, Jean-Luc Verdeil,

Thomas P. Jahn, Wieland Fricke

## SUPPLEMENTARY FILE S1

*Details of primers used*

**Table S1. Primers**

(a) qPCR expression analyses: barley MIP genes, HvPIP2;7 and HvSIP1;1 were annotated.

| Aquaporins | Accession Number         | Forward 5'-3'             | Reverse 5'-3'              | Length (bp) |
|------------|--------------------------|---------------------------|----------------------------|-------------|
| HvPIP1;1   | <a href="#">AB286964</a> | ACTGCGTGTTCTGAGTGAATTTCT  | CATACAAGTCCTCTGTCTGGGTTTC  | 153         |
| HvPIP1;2   | <a href="#">AB275278</a> | CAAGAGCCCGGACTAGTATAC     | CGCTCGCTCAAGAACAGTAC       | 174         |
| HvPIP1;3   | <a href="#">AB009308</a> | AATAGTTCTCAAATCTGCCGTCTC  | TACTGGTACAATGCAAAAGGTAGG   | 131         |
| HvPIP1;4   | <a href="#">AB275279</a> | CGACTGTGGATGGAGTCTTC      | CCTTATATGGGCACATAGCC       | 189         |
| HvPIP1;5   | <a href="#">AB009309</a> | ATCGGAATAACGAGCCTGTTTC    | ACCACAACACTGTCACACTGAATTAC | 117         |
| HvPIP2;1   | <a href="#">AB219366</a> | AGATATGTGCGAAGAAGAAGGCCG  | ATATGCACAAGCCGAGGAACGGTA   | 123         |
| HvPIP2;2   | <a href="#">AB377269</a> | TCCTTGTCGCCCTTAATGTTGTGCG | ATTGCAGCACTTGTCACTCACAGC   | 103         |
| HvPIP2;3   | <a href="#">AB275280</a> | CGGATCGTGTATTATGCAAGCGTC  | GGCATCCAAATTCCTCAACGATCC   | 106         |
| HvPIP2;4   | <a href="#">AB219525</a> | TCGAGTGTGTCTTCGTCAGTCAGT  | AATCAGCTCACGAACCGAACCGTA   | 151         |
| HvPIP2;5   | <a href="#">AB377270</a> | GCAAGATTGAAGCAATGGCGACCT  | CGAATTACAACACACGGCACGCAT   | 168         |
| HvPIP2;7   | <a href="#">AK248491</a> | GCGCGAACCTAAATCACATA      | GGACATACATCGCGAGAACA       | 102         |
| HvTIP1;1   | <a href="#">AB540221</a> | TCCGTCCGTGTGGTCGAT        | TCGTACAGGTTTCACAGCACCA     | 135         |
| HvTIP1;2   | <a href="#">AB540226</a> | GATCATCCATGCGTCATCGCCATG  | ACTGAGGACGTACACCAAGACAAG   | 169         |
| HvTIP2;1   | <a href="#">AB540222</a> | GACCCGTCTCTGAATTTGCATCGT  | CGTGACCGTGACACACCATTTGTA   | 96          |
| HvTIP2;2   | <a href="#">AB540223</a> | CCTTGTGTGAATTTCCCTTCTC    | CGTTCATGTAAGATCGAGTGGT     | 84          |
| HvTIP2;3   | <a href="#">AB540224</a> | TAAGCCATCCATGTGAAGGGTTCGT | CTGGGCTTCGATCTGAACCAAACA   | 138         |
| HvTIP3;1   | <a href="#">AB540228</a> | AGCTGCTGCTGCTTCAAATCCT    | ACCATAGGGTCAACCATGCACA     | 144         |
| HvTIP4;1   | <a href="#">AB540225</a> | TTTGCAATGTATACCGGTGTGT    | AGCTTCTAACCCCATCCCTCTA     | 134         |
| HvTIP5;1   | <a href="#">AB540227</a> | TTCAAGAACCAGGCCGTGTA      | GAACACCAGGTTCTGATGCAC      | 81          |
| HvNIP1;1   | <a href="#">AB540230</a> | AGTGGTCTTGGCCTAACTGAACT   | TGCACACCTGTCTGTCTCCATCAA   | 142         |
| HvNIP1;2   | <a href="#">AB540231</a> | TTGTGGGTAGTGAATTTTCGATG   | GCAGGGCATAACCACTAGTTTC     | 159         |
| HvNIP2;1   | <a href="#">AB540229</a> | ATAGCGTGAGTACATGGCTGGTGT  | ACCTCAGACGCAGTACAAAGCGAA   | 114         |
| HvSIP1;1   | <a href="#">AK252830</a> | ACGCGGCAAAGAATTCAGGCAA    | TCAGCCACGATTGCTTTTCGAGT    | 137         |
| HvSIP2;1   | -                        | CCAAGAAGACCAAGGAGCAAGA    | GACTTCAACCCAGGTGATGGTA     | 127         |

(b) Reference genes used (bold) and additionally tested for qPCR expression analyses.

| <b>Housekeeping genes</b>          | <b>Accession Number</b>  | <b>Forward 5'-3'</b>         | <b>Reverse 5'-3'</b>         | <b>Length (bp)</b> |
|------------------------------------|--------------------------|------------------------------|------------------------------|--------------------|
| <b>EF-1</b>                        | <a href="#">Z50789</a>   | AAGGCTGCCATCAAGAAGAA         | CAGAAGCATCCATGTTTTCCC        | 182                |
| <b>H<sup>+</sup>-ATPase</b>        | <a href="#">AJ344078</a> | ACATCGACACCATCAACCAA         | ACAAC TAGGGGCTGGTCAGA        | 163                |
| <b>GADPH</b>                       | <a href="#">X60343</a>   | GTGAGGCTGGTGCTGATTACG        | TGGTGCAGCTAGCATTGAGAC        | 198                |
| <b>HSP70</b>                       | <a href="#">AK248694</a> | CGACCAGGGCAACCGCACCAC        | ACGGTGTGATGGGGTTCATG         | 108                |
| <b><math>\alpha</math>-Tubulin</b> | <a href="#">U40042</a>   | AGTGTCCTGTCCACCCACTC         | AGCATGAAGTGGATCCTTGG         | 248                |
| <b>Cyclophilin</b>                 | <a href="#">AK253120</a> | CCTGTCGTGTCGTCGGTCTAAA       | ACGCAGATCCAGCAGCCTAAAG       | 122                |
| <b>Ubiquitin</b>                   | <a href="#">X04133</a>   | AGGCGAAGATCCAGGACAAG         | ACAACCAGACATGCTCCAACCT       | 244                |
| <b>HvSIP2;1</b>                    | Contig19630<br>_at       | ACCCAAGAAGACCAAGGAGCA<br>AGA | AGGACTTCAACCCAGGTGATGGT<br>A | 127                |

(c) Up- and Down primers used for in-situ hybridisation experiments.

| <b>Aquaporins and Reference</b> | <b>Primers 5'-3'</b>      |
|---------------------------------|---------------------------|
| <b>HvPIP1;2-Up</b>              | CCGCCATCATCTACAACAAG      |
| <b>HvPIP1;2-Down</b>            | CGCTCGCTCAAGAACAGTAC      |
| <b>HvPIP2;2-Up</b>              | TACTGCTCCTCGTGCCATC       |
| <b>HvPIP2;2-Down</b>            | ATTGCAGCACTTGTCACACAGC    |
| <b>HvPIP2;5-Up</b>              | AGGCCTGGGATGATCAGTGG      |
| <b>HvPIP2;5-Down</b>            | CGAATTACAACACACGGCACGCAT  |
| <b>HvPIP2;7-Up</b>              | GTACAACCAGCACAAGGCATGGAA  |
| <b>HvPIP2;7-Down</b>            | GGACATACATCGCGAGAACA      |
| <b>HvTIP1;1-Up</b>              | GGGGTACCAGTGGGTGTACT      |
| <b>HvTIP1;1-Down</b>            | TCGTCACAGGTTTCACAGCACCA   |
| <b>HvTIP2;3-Up</b>              | CCTGTACATGTGCGACAACC      |
| <b>HvTIP2;3-Down</b>            | CTGGGCTTCGATCTGAACCAAACA  |
| <b>Rib-Up</b>                   | CCGACCCTGATCTTCTGTGAAGGG  |
| <b>Rib-Down</b>                 | CCAAGTCAGACGAACGATTTGCACG |
| <b>E-T7</b>                     | GCGAAATTAATACGACTCAC      |

(d) T7-Up- and T7-Down primers used for in-situ hybridisation experiments.

| <b>Aquaporins and reference gene</b> | <b>Primers 5'-3'</b>                                    |
|--------------------------------------|---------------------------------------------------------|
| <b>HvPIP1;2-T7-Up</b>                | GAAATTAATACGACTCACTATAGGGAGACCGCCATCATCTACAACAAG        |
| <b>HvPIP1;2-T7-Down</b>              | GAAATTAATACGACTCACTATAGGGAGACGCTCGCTCAAGAACAGTAC        |
| <b>HvPIP2;2-T7-Up</b>                | GAAATTAATACGACTCACTATAGGGAGATACTGCTCCTCGTGCCATC         |
| <b>HvPIP2;2-T7-Down</b>              | GAAATTAATACGACTCACTATAGGGAGATTGCAGCACTTGTCACACAGC       |
| <b>HvPIP2;5-T7-Up</b>                | GAAATTAATACGACTCACTATAGGGAGAGGCCTGGGATGATCAGTGG         |
| <b>HvPIP2;5-T7-Down</b>              | GAAATTAATACGACTCACTATAGGGAGACGAATTACAACACACGGCACGCAT    |
| <b>HvPIP2;7-T7-Up</b>                | GAAATTAATACGACTCACTATAGGGAGAGTACAACCAGCACAAGGCATGGAA    |
| <b>HvPIP2;7-T7-Down</b>              | GAAATTAATACGACTCACTATAGGGAGAGGACATACATCGCGAGAACA        |
| <b>HvTIP1;1-T7-Up</b>                | GAAATTAATACGACTCACTATAGGGAGAGGGGTACCAGTGGGTGTACT        |
| <b>HvTIP1;1-T7-Down</b>              | GAAATTAATACGACTCACTATAGGGAGACAGGTTTCACAGCACCA           |
| <b>HvTIP2;3-T7-Up</b>                | GAAATTAATACGACTCACTATAGGGAGACCTGTACATGTGCGACAAC         |
| <b>HvTIP2;3-T7-Down</b>              | GAAATTAATACGACTCACTATAGGGAGACTGGGCTTCGATCTGAACCA        |
| <b>Rib-T7-Up</b>                     | GCGAAATTAATACGACTCACTATAGGGAGACCGACCCTGATCTTCTGTGAAGGG  |
| <b>Rib-T7-Down</b>                   | GCGAAATTAATACGACTCACTATAGGGAGACCAAGTCAGACGAACGATTTGCACG |

(e) Transient expression in onion epidermis: Cloning pSAT6-EYFP-N

| Aquaporins | Cloning site | Primers                                 |
|------------|--------------|-----------------------------------------|
| HvPIP2;2   | NcoI         | F: 5'-TATAAGCTTCAGCAGCCATGGCCAAGGAGG-3' |
|            | ApaI         | R: 5'-ATAGGGCCCGAAGGAGCCGAGCGCCTTG-3'   |
| HvPIP2;7   | NcoI         | F: 5'-AGATACCATGGCCATGTCCAAGGAGG-3'     |
|            | ApaI         | R: 5'-TATGGGCCCGGTGCTCCTGAACGA-3'       |
| HvTIP1;1   | NcoI         | F: 5'-TTCTCCATGGCGAAAATGCCGGTCAAC-3'    |
|            | ApaI         | R: 5'-TAAGGGCCCGTAGTCGGTGGTGGGGAG-3'    |

(f) Transient expression in onion epidermis: Cloning pSAT6-EYFP-C

| Aquaporins | Cloning site | Primers                                 |
|------------|--------------|-----------------------------------------|
| HvPIP2;2   | HindIII      | F: 5'-TATAAGCTTCAGCAGCCATGGCCAAGGAGG-3' |
| HvPIP2;7   | HindIII      | F: 5'-ATTAAGCTTCAGGTCGTCGAACCATGTCC-3'  |
| HvTIP1;1   | HindIII      | F: 5'-AGTAAGCTTGAGCGAAAATGCCGGT-3'      |

(g) Expression yeast for swelling and uptake experiments

| Aquaporins | Forward 5'-3'                   | Reverse 5'-3'                 |
|------------|---------------------------------|-------------------------------|
| HvPIP1;2   | GGATTAAUAATGGAGGGCAAGGAGGAG     | GGGTAAUCTAGTCGCGGCTCTTGAAG    |
| HvPIP2;2   | GGATTAAUAATGGCCAAGGAGGTGAGCG    | GGGTAAUTCAGTTGCTCCGGCTGCTCC   |
| HvPIP2;5   | GGATTAAUAATGGCGAAGGACGAGGTG     | GGGTAAUTTACGCGTTGCTCCTGAAG    |
| HvPIP2;7   | GGATTAAUAATGTCCAAGGAGGAGGTG     | GGGTAAUTTAGGTTTCGCGCGGTGG     |
| HvTIP1;1   | GGATTAAUAATGCCGGTCAGCAGGATCGC   | GGGTAAUTTAGTAGTCGGTGGTGGGGAG  |
| HvTIP1;2   | GGATTAAUAATGCCGGTGAGCAGGATCGC   | GGGTAAUTCAGTACTCGGCGGTGGGGA   |
| HvTIP2;3   | GGATTAAUAATGCCAGGCTCCATCGCCTTTG | GGGTAAUTTAGTAGTCATTGCTGGCGACG |

(h) Cloning of barley MIPs

| Aquaporins | Forward 5'-3'              | Reverse 5'-3'              |
|------------|----------------------------|----------------------------|
| HvPIP1;2   | TCTGCCTAACAAGCTAAGCAGCTC   | CGCTCGCTCAAGAACAGTAC       |
| HvPIP2;1   | AGCACCGTTCAAGCTAGAGG       | ATATGCACAAGCCGAGGAACGGTA   |
| HvPIP2;2   | TCCATCAGACAAGAGAGAGAGAGCG  | ATTGCAGCACTTGTCACACTCACAGC |
| HvPIP2;5   | AAACCACACACACTGATGGCGAAG   | CGAATTACAACACACGGCACGCAT   |
| HvPIP2;7   | ACTAAAGTTTGCACCAGGTGTCGTCG | GGACATACATCGCGAGAACA       |
| HvTIP1;1   | CTTCTTCTCTAGCGAGCTAGGCTT   | TCGTCACAGGTTTCACAGCACCA    |
| HvTIP1;2   | AACACTAGCAGCTACACAGCACAC   | ACTGAGGACGTACACCAAGACAAG   |
| HvTIP2;3   | GCGTGTTCTCAGCGACAACATTTT   | CTGGGCTTCGATCTGAACCAAACA   |
| HvNIP1;1   | TGGTTACTCCTGTGTTCCGC       | TGCACACCTGTCTGTCTCCATCAA   |

## SUPPLEMENTARY FILE S2

*Annotation and protein sequences of barley MIPs and of MIPs of Arabidopsis, maize and rice used for construction of phylogenetic trees*

**Table S2.** *Annotation and protein sequences of barley MIPs and of MIPs of Arabidopsis, maize and rice used for construction of phylogenetic trees.*

(a) Barley (*Hordeum vulgare* L.) MIPs. \*, the barley PIP1 HvPIP1;6 (Wei et al. 2007, GU989200, ADG03686) is allelic to HvPIP1;1; \*\*, not available

| Barley MIPs          | cDNA clone accession No                                         | Accession No.            |                          | amino acid |
|----------------------|-----------------------------------------------------------------|--------------------------|--------------------------|------------|
|                      | Affymetrix probe set ID (BarleyBase)                            | Nucleic acid             | Protein                  |            |
| HvPIP1;1*            | Contig1237_s_at/Contig1235_at/<br>Contig1242_at/Contig1225_s_at | <a href="#">AB286964</a> | <a href="#">BAF41978</a> | 288        |
| HvPIP1;2             | Contig1228_s_at                                                 | <a href="#">AB275278</a> | <a href="#">BAF33067</a> | 292        |
| HvPIP1;3             | Contig1226_at/Contig1239_s_at                                   | <a href="#">AB009308</a> | <a href="#">BAA23745</a> | 292        |
| HvPIP1;4             | Contig1219_s_at                                                 | <a href="#">AB275279</a> | <a href="#">BAF33068</a> | 292        |
| HvPIP1;5             | Contig1230_at                                                   | <a href="#">AB009309</a> | <a href="#">BAA23746</a> | 290        |
| HvPIP2;1             | Hv08C12u_x_at                                                   | <a href="#">AB219366</a> | <a href="#">BAE02729</a> | 286        |
| HvPIP2;2             | Contig1216_s_at                                                 | <a href="#">AB377269</a> | <a href="#">BAG06230</a> | 284        |
| HvPIP2;3             | Contig1223_at                                                   | <a href="#">AB275280</a> | <a href="#">BAF33069</a> | 290        |
| HvPIP2;4             | -                                                               | <a href="#">AB219525</a> | <a href="#">BAE06148</a> | 290        |
| HvPIP2;5             | Contig1222_s_at/ Contig1240_at                                  | <a href="#">AB377270</a> | <a href="#">BAG06231</a> | 290        |
| HvPIP2;7             | Contig19393_at                                                  | <a href="#">AK248491</a> | _**                      | 291        |
| HvTIP1;1             | HS07J06u_x/s_at/ HS18A22u_at                                    | <a href="#">AB540221</a> | <a href="#">BAI66434</a> | 250        |
| HvTIP1.2             | HVSMEf0019H18r2_at/Contig1309_at                                | <a href="#">AB540226</a> | <a href="#">BAI66439</a> | 252        |
| HvTIP2;1             | Contig1310_at                                                   | <a href="#">AB540222</a> | <a href="#">BAI66435</a> | 249        |
| HvTIP2;2             | Contig1308_at                                                   | <a href="#">AB540223</a> | <a href="#">BAI66436</a> | 249        |
| HvTIP2;3             | Contig1315_s_at                                                 | <a href="#">AB540224</a> | <a href="#">BAI66437</a> | 248        |
| HvTIP3;1             | Contig3772_at/HT03K14r_(s)_at                                   | <a href="#">AB540228</a> | <a href="#">BAI66441</a> | 263        |
| HvTIP4;1             | Contig7377_at                                                   | <a href="#">AB540225</a> | <a href="#">BAI66438</a> | 257        |
| HvTIP5;1             | AF254799_CDS-2_at                                               | <a href="#">AB540227</a> | <a href="#">BAI66440</a> | 262        |
| HvNIP1;1             | Contig14229_at                                                  | <a href="#">AB540230</a> | <a href="#">BAI66443</a> | 278        |
| HvNIP1;2             | Contig19214_at                                                  | <a href="#">AB540231</a> | <a href="#">BAI66444</a> | 333        |
| HvNIP2;1<br>(HvLsi6) | Contig5632_at/Contig5634_at                                     | <a href="#">AB540229</a> | <a href="#">BAI66442</a> | 295        |
| HvSIP1;1             | Contig6340_at/Contig6339_s_at                                   | <a href="#">AK252830</a> | -                        | 244        |
| Partial<br>HvSIP2;1  | Contig19630_at                                                  | -                        | -                        | 142        |

(b) *Arabidopsis* (*A. thaliana*) MIPs

| <b><i>Arabidopsis</i> MIPs</b> | <b>Accession No.</b> |
|--------------------------------|----------------------|
| AtPIP1;1                       | CAB71073             |
| AtPIP1;2                       | AAC28529             |
| AtPIP1;3                       | AAF81320             |
| AtPIP1;4                       | AAF02782             |
| AtPIP1;5                       | CAA20461             |
|                                |                      |
| AtPIP2;1                       | CAB67649             |
| AtPIP2;2                       | AAD18142             |
| AtPIP2;3                       | AAD18141             |
| AtPIP2;4                       | BAB09839             |
| AtPIP2;5                       | CAB41102             |
| AtPIP2;6                       | AAC79629             |
| AtPIP2;7                       | CAA17774             |
| AtPIP2;8                       | AAC64216             |
|                                |                      |
| AtTIP1;1                       | AAD31569             |
| AtTIP1;2                       | BAB01832             |
| AtTIP1;3                       | AAC62778             |
| AtTIP2;1                       | BAB01264             |
| AtTIP2;2                       | CAB10515             |
| AtTIP2;3                       | BAB09071             |
| AtTIP3;1                       | AAG52132             |
| AtTIP3;2                       | AAF97261             |
| AtTIP4;1                       | AAC42249             |
| AtTIP5;1                       | CAB51216             |
|                                |                      |
| AtNIP1;1                       | CAA16760             |
| AtNIP1;2                       | CAA16748             |
| AtNIP2;1                       | AAC26712             |
| AtNIP3;1                       | AAG50717             |
| AtNIP4;1                       | BAB10360             |
| AtNIP4;2                       | BAB10361             |
| AtNIP5;1                       | CAB39791             |
| AtNIP6;1                       | AAF14664             |
| AtNIP7;1                       | AAF30303             |
|                                |                      |
| AtSIP1;1                       | AAF26804             |
| AtSIP1;2                       | BAB09487             |
| AtSIP2;1                       | CAB72165             |

(c) Rice (*Oryza sativa*) MIPs

| <b>Rice MIPs</b> | <b>Accession No.</b> |
|------------------|----------------------|
| OsPIP1;1         | BAD28398             |
| OsPIP1;2         | Q7XSQ9               |
| OsPIP1;3         | BAD22920             |
|                  |                      |
| OsPIP2;1         | BAC15868             |
| OsPIP2;2         | BAD23735             |
| OsPIP2;3         | CAD41442             |
| OsPIP2;4         | BAC16113             |
| OsPIP2;5         | BAC16116             |
| OsPIP2;6         | CAE05002             |
| OsPIP2;7         | BAD46581             |
| OsPIP2;8         | AAP44741             |
| OsTIP1;1         | AAK98737             |
| OsTIP1;2         | BAB63833             |
| OsTIP2;1         | BAD25765             |
| OsTIP2;2         | BAD61899             |
| OsTIP3;1         | AAG13544             |
| OsTIP3;2         | CAE05657             |
| OsTIP4;1         | AAS98488             |
| OsTIP4;2         | BAA92993             |
| OsTIP4;3         | BAA92991             |
| OsTIP5;1         | BAG92052             |
|                  |                      |
| OsNIP1;1         | BAD27715             |
| OsNIP1;2         | BAD73177             |
| OsNIP1;3         | AAV44140             |
| OsNIP1;4         | BAD53665             |
| OsNIP2;1         | BAD16128             |
| OsNIP2;2         | BAD37471             |
| OsNIP3;1         | AAG13499             |
| OsNIP3;2         | BAC99758             |
| OsNIP3;3         | BAC65382             |
| OsNIP4;1         | BAB61180             |
|                  |                      |
| OsSIP1;1         | BAB32914             |
| OsSIP2;1         | Q10M80               |

(d) Maize (*Zea mays*) MIPs

| <b>Maize MIPs</b> | <b>Accession No.</b>     |
|-------------------|--------------------------|
| ZmPIP1;1          | <a href="#">Q41870</a>   |
| ZmPIP1;2          | <a href="#">AAD29676</a> |
| ZmPIP1;3          | <a href="#">AAK26754</a> |
| ZmPIP1;4          | <a href="#">AAK26755</a> |
| ZmPIP1;5          | <a href="#">AAK26756</a> |
| ZmPIP1;6          | <a href="#">AAK26757</a> |
| ZmPIP2;1          | <a href="#">AAK26758</a> |
| ZmPIP2;2          | <a href="#">AAK26759</a> |
| ZmPIP2;3          | <a href="#">AAK26760</a> |
| ZmPIP2;4          | <a href="#">AAK26761</a> |
| ZmPIP2;5          | <a href="#">AAD28761</a> |
| ZmPIP2;6          | <a href="#">AAK26762</a> |
| ZmPIP2;7          | <a href="#">AAK26763</a> |
|                   |                          |
| ZmTIP1;1          | <a href="#">AAC09245</a> |
| ZmTIP1;2          | <a href="#">AAK26767</a> |
| ZmTIP2;1          | <a href="#">AAK26768</a> |
| ZmTIP2;2          | <a href="#">AAK26769</a> |
| ZmTIP2;3          | <a href="#">AAK26770</a> |
| ZmTIP3;1          | <a href="#">AAK26771</a> |
| ZmTIP3;2          | <a href="#">AAK26848</a> |
| ZmTIP4;1          | <a href="#">AAK26772</a> |
| ZmTIP4;2          | <a href="#">AAK26773</a> |
| ZmTIP4;3          | <a href="#">AAK26774</a> |
| ZmTIP4;4          | <a href="#">AAK26775</a> |
| ZmTIP5;1          | <a href="#">AAK26776</a> |
|                   |                          |
| ZmNIP1;1          | <a href="#">AAK26750</a> |
| ZmNIP2;1          | <a href="#">AAK26751</a> |
| ZmNIP2;2          | <a href="#">AAK26752</a> |
| ZmNIP2;3          | <a href="#">AAK26849</a> |
| ZmNIP3;1          | AAK26753                 |
|                   |                          |
| ZmSIP1;1          | AAK26764                 |
| ZmSIP1;2          | AAK26765                 |
| ZmSIP2;1          | AAK26766                 |



(e) Number of MIPs, identified so far, and members of PIP/TIP/NIP/SIP subgroups in selected plant species.

|              | <i>Arabidopsis</i> | <i>Rice</i> | <i>Maize</i> | <i>Wheat</i> | <i>Cotton</i> | <i>Barley</i> |
|--------------|--------------------|-------------|--------------|--------------|---------------|---------------|
| <b>PIP1s</b> | 5                  | 3           | 6            | 12           | 15            | 5             |
| <b>PIP2s</b> | 8                  | 8           | 7            | 12           | 13            | 6             |
| <b>TIPs</b>  | 10                 | 10          | 11           | 11           | 23            | 8             |
| <b>NIPs</b>  | 9                  | 10          | 4            | -            | 12            | 4             |
| <b>SIPs</b>  | 3                  | 2           | 3            | -            | 7             | 2             |
| <b>Total</b> | <b>36</b>          | <b>33</b>   | <b>31</b>    | <b>35</b>    | <b>70</b>     | <b>25</b>     |

(f) Protein sequences (order: barley, maize, rice, *Arabidopsis*)

**PIP1s**

>HvPIP1;1 (HvPIP1;6)

MEGKEEDVRLGANKYSERHAIGTAAQGSSEDKDYKEPPPAPLFEPEGELKSWSFYRAGIAEFMATFLFLYVTI  
 LTVMGYSGAASKCATVGIQGIAWSFGGMIFALVYCTAGISGGHINPAVTFGLFLARKLSLTRAVFYIIMQC  
 LGAICGAGVVKGFQQGLYMNGGGANVVASGYTKGSLGAEIIGTFVLVYTVFSATDAKRNARDSHVPILA  
 PLPIGFAVFLVHLATIPITGTGINPARSLGAAI IYNREHAWSDDHWIFWVGPFIGAALAAIYHQVVIRAI  
 PFKTS

>HvPIP1;2

MEGKEEDVRLGANRYSERQPIGTAAQGGGADEKDYKEPPPAPLFEAEELTSWSFYRAGIAEFLATFLFLYI  
 SVLTVMGVGNPSPGSKCGTVGIQGIAWSFGGMIFVLVYCTAGISGGHINPAVTFGLFLARKLSLTRAVFYI  
 VMQCLGAICGAGVVKGFQTTLYMNGGGANSVAPGYTKGDGLGAEIVGTFVLVYTVFSATDAKRSARDSHV  
 PILAPLPIGFAVFLVHLATIPITGTGINPARSLGAAI IYNKKQSWDDHWIFWVGPFPGAALAAIYHVVIR  
 AIPFKSRD

>HvPIP1;3

MEGKEEDVRLGANRYSERQPIGTAAQGGGADEKDYKEPPPAPLFEAEELTSWSFYRAGIAEFLATFLFLYI  
 SVLTVMGVGNPSPGSKCGTVGIQGIAWSFGGMIFVLVYCTAGISGGHINPAVTFGLFLARKLSLTRAVFYI  
 VMQCLGAICGAGVVKGFQTTLYQNGGGANSVAAGYTKGDGLGAEIVGTFVLVYTVFSATDAKRSARDSHV  
 PILAPLPIGFAVFLVHLATIPITGTGINPARSLGAAI IYNKKQAWDDHWIFWVGPFIGAALAAIYHVVIR  
 AIPFKSRG

>HvPIP1;4

MEGKEEDVRLGANRYSERQPIGTAAQGGGADEKDYKEPPPAPLFEAEELSSWSFYRAGIAEFLATFLFLYI  
 SVLTVMGVGNPSPGSKCGTVGIQGIAWSFGGMIFVLVYCTAGISGGHINPAVTFGLFLARKLSLTRAVFYI  
 VMQCLGAICGAGVVKGFQTTLYQNGGGANSVAAGYTKGDGLGAEIVGTFVLVYTVFSATDAKRSARDSHV  
 PILAPLPIGFAVFLVHLATIPITGTGINPARSLGAAI IYNKKQAWDDHWIFWVGPFIGAALAAIYHVVIR  
 AIPFKSRD

>HvPIP1;5

MEGKEEDVRLGANRYSERQPIGTAAQGGGDDKDYKEPPPAPLFEPEGELKSWSFYRAGIAEFVATFLFLYVT  
 VLTVMGVSKAPSKCATVGVQGIAWSFGGMIFALVYCTAGISGGHINPAVTFGLFLARKLSLTRAIFYIIMQ  
 CLGAICGAGVVKGFQQGLYMGNGGGANVVASGYTKGDGLGAEIIGTFVLVYTVFSATDAKRNARDSHVPIL  
 APLPIGFAVFLVHLATIPITGTGINPARSLGAAI IYNRDHAWNDHWIFWVGPFVGAALAAVYHQVIIRAIP  
 FNKSRS

>ZmPIP1;1

MEGKEEDVRLGANKFSERHAIGTAAQGTDDKDYKEPPPAPLFEPEGELKSWSFYRPGIAEFVATFLFLYISI  
 LTVMGVSKSTSKCATVGIQGIAWSFGGMILALVYCTAGISGHINPAVTFGLFLARKLSLTRAVFYIIMQCL  
 GAICGRGVVKGFQQGLYMGNGGRRNVVAPGYTKGDGLGAEIVGTFILVYTVFSATDAKRRARDSHVPI LAP  
 LPIGFAVFLVHLATMGITGTGINPARSLGAAVIYNQHHAWADHWIFWVGPFIGAALAAIYHQVIIRAIPFK  
 SRS

>ZmPIP1;2

MEGKEEDVRLGANKFSERQPIGTAAQGAADDKDYKEPPPAPLFEPEGELKSWSFYRAGIAEFVATFLFLYIT  
 I LTVMGVSKSTSKCATVGIQGIAWSFGGMIFALVYCTAGISGGHINPAVTFGLFLARKLSLTRALFYIIMQ  
 CLGAVCGAGVVKGFQQGLYMGNGGGANVVAPGYTKGDGLGAEIVGTFILVYTVFSATDAKRNARDSHVPIL  
 APLPIGFAVFLVHLATIPITGTGINPARSLGAAI IYNRDHAWNDHWIFWVGPFIGAALAAIYHQVIIRAIP  
 FKRS

>ZmPIP1;3

MEGKEEDVRLGANKFSERQPIGTAAQGAGAGDDDKDYKEPPPAPLFEPEGELKSWSFYRAGIAEFVATFLFL  
 YITVLTVMGVSKSTSKCATVGIQGIAWSFGGMIFALVYCTAGISGGHINPAVTFGLFLARKLSLTRAIFYI  
 IMQCLGAICGAGVVKGFQQGLYMGNGGGANVVAPGYTKGDGLGAEIVGTFILVYTVFSATDAKRNARDSHV  
 PILAPLPIGFAVFLVHLATIPITGTGINPARSLGAAI IYNRDHAWSDHWIFWVGPFIGAALAAIYHQVIIR  
 AIPFKSRS

>ZmPIP1;4

MEGKEEDVRLGANKFSERQPIGTAAQGAGAGDDDKDYKEPPPAPLFEPEGELKSWSFYRAGIAEFVATFLFL  
 YITVLTVMGVSKSTSKCATVGIQGIAWSFGGMIFALVYCTAGISGGHINPAVTFGLFLARKLSLTRAIFYI  
 IMQCLGAICGAGVVKGFQQGLYMGNGGGANVVAPGYTKGDGLGAEIVGTFILVYTVFSATDAKRNARDSHV  
 PILAPLPIGFAVFLVHLATIPITGTGINPARSLGAAI IYNRDHAWSDHWIFWVGPFIGAALAAIYHQVIIR  
 AIPFKSRS

>ZmPIP1;5

MEGKEEDVRLGANRYSERQPIGTAAQGTTEEKDYKEPPPAPLFEAEELTSWSFYRAGIAEFVATFLFLYISI  
 LTVMGVSKSSSKCATVGIQGIAWSFGGMIFALVYCTAGISGGHINPAVTFGLFLARKLSLTRALFYMVMQC  
 LGAICGAGVVKGFQEGLYMGAGGGANAVNPGYTKGDGLGAEIVGTFVLVYTVFSATDAKRSARDSHVPILA  
 PLPIGFAVFLVHLATIPITGTGINPARSLGAAI IYVNRSHAWNDHWIFWVGPFIGAALAAIYHVVIIRALPF  
 KSRD

>ZmPIP1;6

MAGGTLQDRSEEDVRVGVDRFPERQPIGTAADDLGRDYSEPPAAPLFEASELSSWSFYRAGIAEFVATFL  
 FLYVTVLTVMGVSKSPSKCGTVGIQGIAWAFGGMIFALVYCTAGVSGGHINPAVTFGLLLARKLSLTRAVY  
 YVVMQCLGAVCGAGVVKAFGSALYESAGGGANAVSPGYTKGDGLGAEVVGTFVLVYTVFSATDAKRTARDS  
 HVPALAPLPIGFAVFLVHLATIPITGTGINPARSLGAAI IYDNPHGWGHWFVVGPFAGAALAAVYHQVV  
 LRAIPFKSSAHY

>ZmPIP2;1

MKGDDVIESGAGGGEFAAKDYTDPPAPLIDAAELGSWSLYRAVIAEFVATLLFLYITVATVIGYKHQTD  
 SASGADAACGGVGLGIAWAFGGMIFVLVYCTAGISGGHINPAVTFGLFLARKVSLVRALLYIVAQCLGAI  
 CGVGLVKAFQSAFYDRYGGGANSLASGYSRGTGLGAEIIGTFVLVYTVFSATDPKRNARDSHVPVLA  
 PLPIGFAVFMVHLATIPVTGTGINPARSLGAAVIYNKDKPWDDHWIFWVGPLVGAAIAAFYHQYILRAGAIKALG  
 SFRSNA

>OsPIP1;1

Megkeedvrlganryserqpigtaaqqagddkdykepppaplfepgelkswsfyragiaefvatflflyit  
iltvmgvskssskcatvgiqgiawsfggmifalvyctagisgghinpavtfglflarklsltraifyivmq  
clgaicgagvkvqfqqglymgngganvvasgytkgdglgaeivgtfilvytvfsatdakrnardshvpil  
aplpgfavflvhlathatipitgtginparslgaaiiynkdhawndhwifwvpgfvgaalaaiyhqviraip  
fksrs

>OsPIP1;2

Msgweptssrrgsrsarrrrapttrtrtrrrrrrrcssqgsssrpstaqgspsswppssssyitalnamgv  
nnstskcatvgiqgiawsfggmifalvyctagisgahinpavtfglflarklsltralnymvmqclgaicg  
agvkvqfkglyettggganvvpagytkgdglgaeivgtfilvytvfsatdakrnardshvpilaplpgf  
avflvhlathatipitgtginparslgaaiiynrghawddhwifwvpgfigaalaaiyhqviraipfksrs

>OsPIP1;3

Megkeedvrlganryterqpigtaaqaekdyreppaapvfeveeltswsfyragiaefvatflflyisi  
ltvmgvnksaskcatvgiqgiawsfggmifalvyctagisgghinpavtfglflarklsltravfymamqc  
lgaicgagvkvqfqrglymgsgganavnpgytkgdglgaeivgtfvlvytvfsatdakrnardshvpila  
plpgfavflvhlathatipitgtginparslgaaiivnrahawddhwifwvpgfigaalaaiyhvviraipf  
ksrd

>AtPIP1;1

MEGKEEDVRVGANKFPERQPIGTSAQSDKDYKEPPAPPFEPGELSSWSFWRAGIAEF IATFLFLYITVLT  
VMGVKRSPNMCASVGIQGIAWAFGGMIFALVYCTAGISGGHINPAVTFGLFLARKLSLTRALYYIVMQCLG  
AICGAGVVKGFQPKQYQALGGGANTVAHGTYKGSGLGAEIIGTFVLVYTVFSATDAKRNARDSHVPI LAPL  
PIGFAVFLVHLATHATIPITGTGINPARSLGAAI IYNKDHSDDDHWVFWVGPFIGAALAALYHVVVIRAIPFKS  
RS

>AtPIP1;2

MEGKEEDVRVGANKFPERQPIGTSAQSDKDYKEPPAPPLFEPGELASWSFWRAGIAEF IATFLFLYITVLT  
VMGVKRSPNMCASVGIQGIAWAFGGMIFALVYCTAGISGGHINPAVTFGLFLARKLSLTRAVYYIVMQCLG  
AICGAGVVKGFQPKQYQALGGGANTIAHGTYKGSGLGAEIIGTFVLVYTVFSATDAKRNARDSHVPI LAPL  
PIGFAVFLVHLATHATIPITGTGINPARSLGAAI IFNKDNAWDDHWVFWVGPFIGAALAALYHVIVIRAIPFKS  
RS

>AtPIP1;3

MEGKEEDVRVGANKFPERQPIGTSAQTDKDYKEPPAPPFEPGELSSWSFYRAGIAEF IATFLFLYITVLT  
VMGVKRAPNMCASVGIQGIAWAFGGMIFALVYCTAGISGGHINPAVTFGLFLARKLSLTRAVFYIVMQCLG  
AICGAGVVKGFQPNPYQTLGGGANTVAHGTYKGSGLGAEIIGTFVLVYTVFSATDAKRSARDSHVPI LAPL  
PIGFAVFLVHLATHATIPITGTGINPARSLGAAI IYNKDHAWDDHWIFWVGPFIGAALAALYHQLVIRAIPFKS  
RS

>AtPIP1;4

MEGKEEDVRVGANKFPERQPIGTSAQSTDKDYKEPPAPPLFEPGELSSWSFYRAGIAEF IATFLFLYITVLT  
TVMGVKRAPNMCASVGIQGIAWAFGGMIFALVYCTAGISGGHINPAVTFGLFLARKLSLTRAVFYIMQCL  
GAICGAGVVKGFQPTPYQTLGGGANTVAHGTYKGSGLGAEIIGTFVLVYTVFSATDAKRSARDSHVPI LAPL  
LLVPILAPLPIGFAVFLVHLATHATIPITGTGINPARSLGAAI IYNKDHSDDDHWIFWVGPFIGAALAALYHQI  
VIRAIPFKSKS

>AtPIP1;5

MEGKEEDVNVGANKFPERQPIGTAAQTESKDYKEPPAPPFEPGELKSWSFYRAGIAEF IATFLFLYVTVL  
TVMGVKRAPNMCASVGIQGIAWAFGGMIFALVYCTAGISGGHINPAVTFGLFLARKLSLTRALFYIVMQCL  
GAICGAGVVKGFQPLYQTNGGANVVAHGTYKGSGLGAEIVGTfvlvytvfsatdakrsardsshvpilap  
lpigfavflvhlathatipitgtginparslgaaiiynkdhawddhwifwvpgfigaalaalYHQIVIRAIPFK  
SKT

**PIP2s**

&gt;HvPIP2;1

MAKDIEAAPQGGEFSSKDYSDFPPAPIVDFEELTKWSLYRAVIAEFVATLLFLYITVATVIGYKHQSDPTV  
 NTTDAACSGVGTGLIAWAFGGMIFVLVYCTAGVSGGHINPAVTFGLFLARKVSLIRALLYIIAQCLGAICG  
 VGLVKGFQSSYYVRYGGGANELSAGYSKGTGLAAEIIIGTFVLVYTVFSATDPKRNARDSHIPVLAPLPIGF  
 AVFMVHLATIPITGTGINPARSLGAAVIYNTDKAWDDQWIFWVGPLIGAAIAAAHYQYVLRASAAKLSYR  
 SN

&gt;HvPIP2;2

MAKEVSEEPEHAAPARKDYSDFPPAPLFDMGELRMWSFYRALIAEFVATLLFLYITVATVIGYKVSQAADP  
 CAGVGVGLIAWAFGGMIFVLVYCTAGISGGHINPAVTFGLLLARKVSLLRVAMYIVAQCAGGIVGAGIVKG  
 IMKDAYQANGGANMVASGFSRGTALGAEIVGTFVLVYTVFSATDPKRSARDSHVPVLAPLPIGFAIFMVH  
 LATIPITGTGINPARSLGAAVIYNKKAAWDNHWIFWVGPFVFGALAAAAYHQYILRAAAIKALGSFRSSRSN

&gt;HvPIP2;3

MAKDIEAAPPGGEYGAKDYSDFPPAPLFDAAEELTKWSLYRAVIAEFVATLLFLYITVATVIGYKHQADPAG  
 PNAADAACSGVILGIAWAFGGMIFVLVYCTAGVSGGHINPAVTFGLFLARKVSLVRVLYIIAQCLGAIC  
 GVGLVKGFQSAFYVRYGGGANELSAGYSKGTGLAAEIIIGTFVLVYTVFSATDPKRSARDSHVPVLAPLPIG  
 FAVFMVHLATIPITGTGINPARSFGAAVIYNNEKAWDDHWIFWVGPFIGAAIAAAHYQYVLRASATKLGSS  
 ASFGRS

&gt;HvPIP2;4

MAKDIEAAPPGGEYAAKDYSDFPPAPLFDAAEELTKWSLYRAVIAEFVATLLFLYITVATVIGYKHQADPAG  
 PNAADAACSGVILGIAWAFGGMIFVLVYCTAGVSGGHINPAVTFGLFLARKVSLVRVLYIIAQCLGAIC  
 GVGLVKGFQSAFYVRYGGGANELSAGYSKGTGLAAEIIIGTFVLVYTVFSATDPKRSARDSHVPVLAPLPIG  
 FAVFMVHLATIPITGTGINPARSFGAAVIYNNEKAWDDHWMFVVGPFIGAAIAALYHQYVLRASATKFGSS  
 ASFGSR

&gt;HvPIP2;5

MAKDEVMETGGGGDFAAKDYTDPPPAPLVDAAELASWSLYRAVIAEFIATLLFLYITVATVIGYKHQTDPA  
 VNSAADAACGGVGLGIAWAFGGMIFVLVYCTAGISGGHINPAVTFGLFLARKVSLVRALLYMVAQCLGAM  
 CGVGLVKAFQSAFYVRYGGGANTLAAGYSKGTGLAAEIIIGTFVLVYTVFSATDPKRSARDSHVPVLAPLP  
 IGFVFMVHLATIPITGTGINPARSLGAAVIYNKDKAWDDQWIFWVGPMIGAAIAAFYHQYILRAGAIKALG  
 SFRSNA

&gt;HvPIP2;7

MSKEEVIAGDGTADVAVEKAPYWDPPPAPLLDTELTRWSLYRAVIAEFVATLIFLYVSLATVIGYKSQSS  
 AQPCTGVGVLGVAWAFGATIFVLVYCTGGVSGGHINPAVTFGLFVGRKLSLVRTVLYIVAQCLGAICGAGM  
 VKGIAGASYEALGGGANTVADGVSAGLGAIEIAGTFVLVYTVLSATDPKRTARDSFIPVLVPLPIGFVAVF  
 IVHLATIPITGTGINPARSLGAAVMYNQHKAWKDHWFVWGPPLLGATVAALYHRFVLRGEAAKALGSFRST  
 GAATART

&gt;ZmPIP2;2

MGKDDVVQSGAGGGFEFAAKDYTDPPPAPLVDAAELGSWSLYRAVIAEFIATLLFLYVTVATVIGYKHQTD  
 SASGAGADAACGGVGLGIAWAFGGMIFVLVYCTAGISGGHINPAVTFGLFLARKVSLVRALLYMVAQCLG  
 AVCGVGLVKAFQSAFYDRYGGGANSLASGYSRAGLGAIEIVGTFVLVYTVFSATDPKRNARDSHVPVLAPL  
 PIGFAVFMVHLATIPVTGTGINPARSLGAAVVYNKDKPWDDHWIFWVGPLLGAIAAFYHQYILRAGAIKA  
 LGSFRSNA

&gt;ZmPIP2;3

MAKQDIEASGPEAGEFSKDYTDPPPAPLIDAEELTKWSLYRAVIAEFIATLLFLYITVATVIGYKHQTD  
 AASGPDAACGGVILGIAWAFGGMIFILVYCTAGISGGHINPAVTFGLFLARKVSLVRALLYIIAQCLGAI  
 CGVGLVKGFQSAFYVRYGGGANELSDGYSKGTGLAAEIIIGTFVLVYTVFSATDPKRSARDSHVPVLAPLP  
 IGFVFMVHLATIPITGTGINPARSLGAAVIYNKDKAWDDQWIFWVGPLIGAAIAAAHYQYVLRASATKLG  
 YRSNA

>ZmPIP2;4

MAKDIEASGPEAGEFSAKDYTDPPPAPLIDAEELTQWSLYRAVIAEFIATLLFLYITVATVIGYKHQTDAS  
ASGPDAACGGVGLGIAWAFGGMIFILVYCTAGISGGHINPAVTFGLFLARKVSLVRALLYIIAQCLGAIC  
GVGLVKGFQSAYYVRYGGGANELSDGYSKGTGLAAEIIIGTFVLVYTVFSATDPKRSARDSHVPVLAPLP  
FAVFMVHLATIPITGTGINPARSLGAAVIYNKDKAWDDQWIFWVGPLIGAAIAAAHYQYVLRASATKLSY  
RSNA

>ZmPIP2;6

MGKEVDVSTLEAGGVRDRDYADPPPAPLIDIDELGKWSLYRAVIAEFVATLLFLYITVATVIGYKHQTDAS  
ASGPDAACSGVGLGIAWAFGGMIFILVYCTAGISGGHINPAVTFGLFLARKVSLVRALLYMAAQSLGAIC  
GVALVKGFQSGFYARYGGGANESAGYSTGTGLAAEIIIGTFVLVYTVFSATDPKRNARDSHVPVLAPLP  
FAVFMVHLATIPITGTGINPARSLGAAVVYNNKAWSDQWIFWVGPFIGAAIAALYHQIVLRASARGYGSF  
RSNA

>ZmPIP2;5

MAKDIEAAAAHEGKDYSDDPPPAPLVDAEELTKWSLYRAVIAEFVATLLFLYITVATVIGYKHQTDAAASGP  
DAACGGVGLGIAWAFGGMIFILVYCTAGVSGGHINPAVTFGLFLARKVSLVRALLYIVAQCLGAICGVGL  
VKGFQSAFYVRYGGGANELSAGYSKGTGLAAEIIIGTFVLVYTVFSATDPKRNARDSHVPVLAPLP  
MVHLATIPITGTGINPARSLGAAVIYNNDKAWDDHWIFWVGPFIGAAIAAAHYQYVLRASAALGSSASFS  
R

>ZmPIP2;7

MAKDVEQVTEQGEYSAKDYHDDPPPAPLIDPDELTKWSLYRAAIAEFIATLLFLYITVLTIIIGYKRQSDTKI  
PGNTECDGVLGIAWAFGGMIFILVYCTAGISGGHINPAVTFGLFLGRKVSRLVALLYMIAQCAGAI  
GLAKGFQKSFYNYRYGGGVNTVSDGYNKGTALGAEIIIGTFVLVYTVFSATDPKRNARDSHVPVLAPLP  
VFMVHLATIPVTGTGINPARSFGPAVIFNNDKAWDDQWIYWVGPFVGAAVAAIYHQYILRGSAILKLSFR  
SNA

>OsPIP2;1

Mgkdevmesggaagefaakdytdpppaplidaaelgswslyraviaefiatllflyitvatvigykhqtda  
sasgadaacggvglgiaawafggmifilvyctagisgghinpavtfglflarkvslvrailyivaqclgai  
cgvglvkafqsayfnrygggantlaagyskgtglaaeiigtflvytvfsatdpkrdardshvpvlaplpi  
gfavfmvhlathipitgtginparsigaavifnekawhnhwifwvgpfgaaiaafyhqyilragaikalg  
sfrsna

>OsPIP2;2

Makdieasapeggefsakdytdpppaplidveeltkwslyraviaefiatllflyitvatvigykhqsd  
vnttdaacsgvgilgiaawafggmifilvyctagisgghinpavtfglflarkvsliravlyiiaqclgai  
gvglvkqfqsyyaryggganelsdgyskgtglaaeiigtflvytvfsatdpkrdardshipvlaplpi  
favfmvhlathipitgtginparslgtaviynkdkawddqwifwvgpligaaiaaahyqyvlrasaaklgsy  
rsna

>OsPIP2;3

Makdieaaaaaeggymakdysdpppaplidaeeltkwslyraviaefvatllflyitvatvigykhqsd  
ganaadaacsgvgilgiaawafggmifilvyctagvsgghinpavtfglflarkvslvravlyivaqslgai  
cgvglvkqfqsafyvryggganelsdgyskgtglaaeiigtflvytvfsatdpkrdardshvpvlaplpi  
gfavfmvhlathipitgtginparslgaaviynqhkawhdhwifwvgpligaaiaaahyqyvlrasaaklgs  
sssfrg

>OsPIP2;4

Mgkevdvstleaggardydpppaplvdvdelgkwslyraliaefvatllflyvtvatvigykhqtdaavn  
gadaacggvglgiaawafggmifilvyctagvsgghinpavtfglflarkvslvrallymaaqclgaicgv  
alvkqfqslydryggganelaagystgtglaaeiigtflvytvfsatdpkrdardshvpvlaplpi  
vfmvhlathipitgtginparslgaavvynnnkawsdqwifwvgpfigaaiaalyhqvilrasargygsfr  
na

>OsPIP2;5

Mgkeadvaggvr dyedpppaplv didelgrwslyrav iaefvatllflyvtvatv igykhqtdasasgdd  
aacggvgvlgiawafggmifilvyctagisgghinpavtfgllarkvslvrailyivaqclgavcgvalv  
kgfqs sfydryggganelaa gyskgtglaaeiigt fvlvytvfsatdpkrdshvpvlaplpligfavfm  
vhl atipvtgtginparslgaavvynnskawsdqwifwvgpfigaiaalyhqivlr asargygsfrsna

>OsPIP2;6

Mskevseepehvrpkdytdpppaplv dvgelrlwsfyraliaefiatllflyitvatv igykvqssadqcg  
gvgtlgiawafggmifilvyctagisgghinpavtfgllarkvsviravmyivaqclggivgvgivkgim  
khqynanggganmvasgystgtalga eiigt fvlvytvfsatdpkrdshvpvlaplpligfavfmvhl a  
tipitgtginparsigaaviynqkkawddhwifwagpfigalaaaayhqyilraaaikalgsfrsnpsn

>OsPIP2;7

Maskeevavetveggaaaakapywdpppaplv dtselgkwslyraliaefmatliflyvsiatv igyknqr  
atvdactgvgylgvawsfgat ifvlvyctggvsgghinpavtfgllarkvslvrtvlyvvaqclgaiaga  
givkgimkrpydalgggantv sdgysaagalga eiigt fvlvytvfsatdpkrtardsfipvlplpligfa  
vfvvhl atipitgtginparslgaavlynqhaawkdhwifwvgpvigaf laaayhklvlrgeaakalssfr  
stsvta

>OsPIP2;8

Maagsgsgsnpkdyqdpppaplv dtgelgkwslyraaiaeftatllvcisvstv igekrqsgeggagvl g  
iaawafgglifvlvyctagisgghmpavt famvlarrvslpraalytmaqvcgavcgaglar amhgggqya  
rhggganelaa gysagagvvaemvgt fvlvytvfsatdpkrkardshvpvlaplpliglavlvhl atipit  
gtginparsl gpalvlglttkawshlwifwvgpfagaaaamiyhhyilrgaaakafasssyr sphf

>AtPIP2;1

MAKDVEAVPGEQFQTRDYQDPPPAPFIDGAELKKWSFYRAVIAEFVATLLFLYITVLTVIGYKIQSDTDAG  
GVDCGGVGLGIAWAFGGMIFILVYCTAGISGGHINPAVTFGLFLARKVSLPRALLYIIAQCLGAICGVGF  
VKAFQSSYYTRYGGGANSLADGYSTGTGLAAEIIIGTFVLVYTVFSATDPKRSARDSHVPVLAPLP IGFVAVF  
MVHLATIPITGTGINPARSFGAAVIYNKSKPWDDHWIFWVGPF IGAAIAAFYHQFVLRASGSKSLGSFRSA  
ANV

>AtPIP2;2

MAKDVEGPEGFQTRDYEDPPPTPFFDADELTKWSLYRAVIAEFVATLLFLYITVLTVIGYKIQSDTKAGGV  
DCGGVGLGIAWAFGGMIFILVYCTAGISGGHINPAVTFGLFLARKVSLIRAVLYMVAQCLGAICGVGFVK  
AFQSSYYDRYGGGANSLADGYNTGTGLAAEIIIGTFVLVYTVFSATDPKRNARDSHVPVLAPLP IGFVAVFMV  
HLATIPITGTGINPARSFGAAVIYNKSKPWDDHWIFWVGPF IGAAIAAFYHQFVLRASGSKSLGSFRSAAN  
V

>AtPIP2;3

MAKDVEGPDGFQTRDYEDPPPTPFFDAEELTKWSLYRAVIAEFVATLLFLYVTVLTVIGYKIQSDTKAGGV  
DCGGVGLGIAWAFGGMIFILVYCTAGISGGHINPAVTFGLFLARKVSLIRAVLYMVAQCLGAICGVGFVK  
AFQSSHYVNYGGGANFLADGYNTGTGLAAEIIIGTFVLVYTVFSATDPKRNARDSHVPVLAPLP IGFVAVFMV  
HLATIPITGTGINPARSFGAAVIFNKS  
KPWDDHWIFWVGPF IGATIAAFYHQFVLRASGSKSLGSFRSAANV

>AtPIP2;4

MAKDLDVNESGPPAARDYKDPAPFFDMEELRKWPLYRAVIAEFVATLLFLYVSVILTVIGYKAQTDATAG  
GVDCGGVGLGIAWAFGGMIFVLVYCTAGISGGHINPAVTVGLFLARKVSLVRTVLYIVAQCLGAICGCGF  
VKAFQSSYYTRYGGGANELADGYNKGTGLAAEIIIGTFVLVYTVFSATDPKRNARDSHVPVLAPLP IGFVAVF  
MVHLATIPITGTGINPARSFGAAVIYNNEKAWDDQWIFWVGPMIGAAAAAFYHQFILRAAAIKALGSFGSF  
GSFRSFA

>AtPIP2;5

MTKEVVGDKRSFSGKDYQDPPPEPLFDATLKGWSFYRALIAEFIATLLFLYVTIMTVIGYKSQTDPALNP  
DQCTGVLGIAWAFGGMIFILVYCTAGISGGHINPAVTFGLLLARKVTLVRVVMVAQCLGAICGVALV  
KAFQSAFYTRYGGGANLSDGYSIGTGVAEIIIGTFVLVYTVFSATDPKRSARDSHVPVLAPLP IGFVAVFI

VHLATIPITGTGINPARSLGAAI IYNKDKAWDHHWIFWVGPFAGAAIAAFYHQFVLRAGA IKALGSFRSQP  
HV

>AtPIP2;6

MTKDELTEEESLSGKDYLDPVPVKTFEVRELKKWSFYRAVIAEF IATLLFLYVTVLTVIGFKSQTDINAGG  
GACASVGLLGISWAFGGMIFILVYCTAGISGGHINPAVTFGLFLASKVSLVRAVSYMVAQCLGATCGVGLV  
KVFQSTYYNRYGGGANMLSDGYNVGVGVGAEI IGTFLVLYTVFSATDPKRNARDSHIPVLAPLP IGF SVFM  
VHLATIPITGTGINPARSF GAAVIYNNQKAWDDQWIFWVGPFVGAIAAFYHQFVLRAGAMKAYGSVRSQL  
HELHA

>AtPIP2;7

MSKEVSEEGKTHHGKDYVDPAPPAPLLDMGELKSWSFYRALIAEF IATLLFLYVTVATVIGHKKQTGPCDGV  
GLLGIAWAFGGMIFVLVYCTAGISGGHINPAVTFGLFLARKVSLVRALGYMIAQCLGAICGVGFVKAFMKT  
PYNTLGGGANTVADGYSKGTALGAEI IGTFLVLYTVFSATDPKRSARDSHIPVLAPLP IGF AVFMVHLATI  
PITGTGINPARSF GAAVIYNNQKAWDDQWIFWVGPFVGAIAAFYHQYILRASAIKALGSFRSNATN

>AtPIP2;8

MSKEVSEEGRHGKDYVDPAPPAPLLDMAELKLWSFYRAI IAEFIATLLFLYVTVATVIGHKNQTGPCGGVGL  
LGIAWAFGGMIFVLVYCTAGISGGHINPAVTFGLFLARKVSLPRAVAYMVAQCLGAICGVGLVKAFMMTPY  
KRLGGGANTVADGYSTGTALGAEI IGTFLVLYTVFSATDPKRSARDSHVPVLAPLP IGF AVFMVHLATIP I  
TGTGINPARSF GAAVIYNNQKAWDDHWIFWVGPFVGAIAAFYHQYILRAAAIKALASFRSNPTN

**TIPs****>HvTIP1;1**

MPVSRIVAGSHREVYEVGALKAAAEFISTLIFVFAGQSGMAFSKLSPDGVATPAGLISAAIAHAFALFV  
 AVSVGANISGGHVNPVAVTFGAFVGGNITLFRGLLYWVAQLLGSTAACFLLRFSTGGLPTGTFGLTGIGAW  
 AVVLEIVMTFGLVYTVYATAVDPKKGSLGTIAPIAIGFIVGANILVGGAFSGASMNPVAVSFGPALVSWEW  
 YQWVYVWGPLIGGGLAGVIYELLFISRTHEQLPTTDY

**>HvTIP1;2**

MPVSRVIAIGAPGELSHPDTRFRAGVAEFISMLIFVFAGSGSGMAFGKLTGGAATPAGLISAAIAHAFALFV  
 AVSVGANISGGHVNPVAVTFGAFVGGNISLLKAVVYWVAQLLGSVIAACLLKLIATGGEAVGAFSLSAGVGVW  
 NAVVFEIVMTFGLVYTVYATAVDPKRGDLGVIAPIAIGFIVGANILAGGAFDGASMNPVAVSFGPAVVS  
 ENHWVYWLGPFAAGAAIAALVYDICFIGQRPHQLPTAEY

**>HvTIP2;1**

MVKLAFGSCGDSFSATSIRAYVAEFIATLLFVFAGVGSIAIYKGLTEDGALDPAGLVAIAIAHAFALFVGV  
 AIAANISGGHLNPAVTFGLAVGGHITILTGFIFYWVAQLLGSAAACFLLKFVTHGKAIPTHAVAAGMNEFEG  
 VVMEIVITFALVYTVYATAADPKKGSGLTIAPIAIGFIVGANILAAGPFSGGSMNPARSFGPAAVAGNFAG  
 NWVYVWGPLIGGGLAGFVYGDVFIASYQPVDQDYA

**>HvTIP2;2**

MVKLAFGSGDSFSATSIRSVAEFIATLLFVFAGVGSIAISYQLTQGGALDPAGLVAIAIAHAFALFVGV  
 AMAANISGGHLNPAVTFGLAVGGHVTILTGLFYWVAQLLGSVACLLLQFVTHAQAMPHTAVSGISEVEGV  
 VMEIVITFALVYTVYATAADPKKGSGLTIAPMAIGFIVGANILAAGPFSGGSMNPARSFGPAAVAGNFSGH  
 WVYVWGPLIGGGLAGLVYGDVFIASYQPVGHQOEYP

**>HvTIP2;3**

MPGSIAGFRFDDSFVSVASLKAYVAEFISTLIFVFAGVGSIAIYTKVSGGAPLDPSGLIAVAICHGFGLFVA  
 VAIGANISGGHVNPVAVTFGLALGGQITILTGLFYWVAQLLGAIVGAFVQFCTGVATPHTGLSGVGAFEGV  
 VMEIVITFGLVYTVYATAADPKKGSGLTIAPIAIGFIVGANILVAGPFSGGSMNPARSFGPAAVAGNFSGH  
 WIYWAGPLIGGGLAGIVYRYLYMCDNHTPVASNDY

**>HvTIP3;1**

MSTAARSTGRRGFTMGRSEDATHPDTIRAAISEFLATAIFVFAAEGSILSLGKLYHDMSTAGGLVAVALAH  
 ALALAVAVSVAVNISGGHVNPVAVTFGALLGGRITLVRALFYWIAQLLGAIVASLLLRLTTGGMRPPGFSLA  
 SGVGDWHAVLLEAVMTFGLMYAYYATLIDPKRGHVGTIGPLAVGFLGANILAGGPFDAAMNPARVFGPA  
 LVGWRWRHHVYVWGLPFLGSGIAGLLYEYVVIPSTETAHAHQPLAPEDY

**>HvTIP4;1**

MAATKHADSFDEREVAVVDAGCVRAVLGELVLTFLVFTGVAAAMAAGVPELPGAAMPMATLAGVALAQAL  
 AAGVLVTAGFHVSGGHLNPAVTVALLARGHITAFRAVLYVVAQLLASSLACILLRCLTGGQPTPVPVHTLG  
 AGIGPMQGLVMEIILTFSLLFVYATILDPRTTVPGYGPMPLTGLIVGANTIAGGNFSGASMNPARSFGPAL  
 ATGVWNTNHWIYVWGPLVGGPLAGFVYEMVFMVKKTHEPLLGWDF

**>HvTIP5;1**

MASNLRVHLKHCFSPPSLRSYFAEFISTLFLVFTAVGSAISARMLTPDVTSNASSLVATAVAQSFGLFAAV  
 FIAADVSGGHVNPVAVTFFAFAIGGHIGVPTAIFYWTCQLLGSTLACLVLHFLSAGQAVPTTRIAVEMTGFGA  
 SIVEGVMTFMVYTVHVAGDPRGQGRKGLATSALGALVVGLVTGACVLAAGSLTGASMNPARSFGPAAVVS  
 DFKNQAVYWAGPMIGAAVAALVHQNLVFPESAPELPHESRHGSVETVVV

**>ZmTIP1;1**

MPINRIALGSHQEVYHPGALKAAFAEFISTLIFVFAGQSGMAFSKLTGGGPTTPAGLIAAAVAHAFALFV  
 AVSVGANISGGHVNPVAVTFGAFVGGNITLFRGLLYWVAQLLGSTVACFLLRFSTGGQATGTFGLTGVSVWE  
 ALVLEIVMTFGLVYTVYATAVDPKKGSLGTIAPIAIGFIVGANILVGGAFDGASMNPVAVSFGPALVSWEW  
 YQWVYVWGPLIGGGLAGVIYELLFISHTHEQLPSTDY



>ZmTIP1;2

MPVSRIVAVGAPGELSHPDTAKAAVAEFISTLIFVVFAGSGSGMAFSKLTGGAATPAGLIAASLAHALALFV  
AVSVGANISGGHVNPAVTFGAFVGGNISLLKALVYVWAQLLGSVVACLLLKIATGGAALGAFSLSAGVGM  
NAVVLEMVMTFGLVYTVYATAVDPKKGDLGVIPIAIGFIVGANILAGGAFDGASMNPAVSFGPAVVTGVW  
ENHWVYVWGPLAGAAIAALVYDIIFIGQRPHQQLPTTAADY

>ZmTIP2;1

MVKLAFGSGVDSFSATSİKAYVAEFİATLLFVFAGVGSİAYGQLTNGGALDPAGLVAİAİAHALALFVGV  
SVAANISGGHLNPAVTFGLAVGGHİTİLTGVFYVWAQLLGATVACLLLGFVTHGKAİPTHAVAGİSELEGV  
VFEVİITFALVYTVYATAADPKKGSİGTİAİPIAİGFİVGANİLAAGPFSGGSMNPARSFİGPAVAAGDFAGN  
WVYVWGPLVGGGLAGLVYGDVFIİGGSYQQVADQDYA

>ZmTIP2;2

MVKLAFGSGVDSFSVTSİKAYVAEFİATLLFVFAGVGSİAİAFGQLTNGGALDPAGLVAİAİVAHALALFVGV  
SVAANTSGGHLNPAVTFGLAVGGHİTVLTGLFYVWAQLLGASVACLLLRVTHGKAİPTHGVSGGTTELEG  
VVFEİVİITFALVYTVYATAADPKKGSİGTİAİPIAİGFİVGANİLAAGPFSGGSMNPARSFİGPAVAADDFAG  
NWVYVWGPLİGGGLAGLVYGDVFIİGGSYQQVADQDYA

>ZmTIP2;3

MVKLAFGSGFRDLSAASİKAYVAEFİATLLFVFAGVGSİAİAYSQİTKGGALDPAGLVAİAİAHAFALFVGV  
SMAANISGGHLNPAVTFGLAVGGHİTİLTGİLYVWAQLLGASVACFLİQYVTHGQİPTHGVSGİSEİEGV  
VMEİVİITFALVYTVYATAADPKKGSİGTİAİPIAİGFİVGANİLAAGPFSGGSMNPARSFİGPAVAAGNFAGN  
WVYVWGPLVGGGLAGLVYGDVFIİASYQPVGQQEYP

>ZmTIP3;1

MSTGVRPGRRFTVGRSEDATHPDTİRAAİSEFİATAİFVFAAEGSVLSİGKMYHDMSTAGGLVAVALAHAL  
ALAVAVAVAVNİSGGHVNPAVTFGALVGGRVSLVRVLYVWAQLLGAVAATLLLRİLATGGMRPPGFALASG  
VGDWHAVLİEAVMTFGLMYAYYATVİDPKRGHVGTİAİPLAVGFLLGANVLAGGPFİDGAGMNPARVFGPALV  
GWRWRHHWVYWLGPFLGAGLAGLVYEYLVİPSADAAPHAHQPLAPEDY

>ZmTIP3;2

MSTATGVRAGRRTVGRSEDATHPDTİRAAİSEFİATAİFVFAAEGSVLSİGKMYHDHSTİSTAGGLVAVA  
LAHALGLAVAVAVAVNVSGGHVNPAVTFGALVGGRVSLVRVLYWAAQLLGAVAATLLLRİLATGGARPPGF  
ALASGVGDGHAVLİEAVMTFGLVYAYYATVVDPKRGHLGTİAİPLAVGFLLGANVLAGGPFİDGAGMNPARVFG  
GPALVGGWRWRHHWVYWLGPFLGAGLAGLVYEYLLİPPADAVPHTHQPLAPEDY

>ZmTIP4;1

MAKLMNKLVDSEFİHDEİPDVGCVRVLAELVİTFLFVFTGVSAAMAAGSDGKPGDAMPMATLAAVAİAHAL  
AAGVLVTAGFHVSGGHLNPAVTVGLMVRGHİTKLRVLYVAAQLLASSAACVLLRFLSGGMVTPVHALGRG  
İSPMQGLVMEVİİLTFİSİLLFVTYAMİLDPRSQVRAİGİPLİTGLİVGANSLAGGNFTGASMNPARSFİGPALAT  
GDWTNHWVYWİGİPLİGGPLAGFVYESİFLVQKMHEPİLLNGEV

>ZmTIP4;2

MAKLVNKLVDSEFDHDEAPAPDVGCVRVLAELVİTFLFVFTGVSAASMAAGAGGKPGEAMPMATLAAVAİAH  
ALAAGVLVTAGFHVSGGHLNPAVTVGİLVRGHİTKLRALLYVAAQLLASSLACİLLRYLSGGMVTPVHALG  
AGİRPMQGLVMEVİİLTFİSİLLFVTYAMİLDPRSQVRTİGİPLİTGLİVGANSLAGGNFTGASMNPARSFİGPAM  
ATGVWTNHWVYWİGİPLİGGSLAGFVYESİLFMVNKTHEPİLLNGDİ

>ZmTIP4;3

MKGLTLGHRGEASEPDDFRGVLGELVİTFLFVFIİGVGAAMTDGATTKGSTAGGDLTAVALGQALVVAVİAT  
AGFHİSGGHVNPAVTLSİAVGGHVTLFRSSLYİAAQMLASSAACFLLRWLİTGGİLATPVHALAEGVGPİQGV  
VAEAVFTFİSİLLFVİYATİLDPRKİLLPGAGİPLİTGLİVGANSVAGAALSİGASMNPARSFİGPAVASGVWTHHW  
VYVWGİPLAGGİPLAVLVYECCFMAAAPHDİLLPQQDP

>ZmTIP4;4

MAKFALGHİHREASDAGCVRAVLAELİLTFİFVFAGVGSAMATGKLAGGGDİTVVGLTAVALAHTLVVAVMV  
SAGİHVSGGHİNPAVTİGLAATGRİTİFRSALYVAAQLLGSTİLACİLLAFİLAVADSGVPVHALGAGVİGALR

GVLMEAVLTFSLFVAVYATVVDPRRAVGGMGPLLVLVVGANVLAGGPFSGASMNPARSFGPALVAGVWAD  
HWVYWVGPLIGGPLAGLVYDGLFMAQGGHEPLPRDDTDF

>ZmTIP5;1

MASNLLVLDLKRCSAPSLRSYLAEFI STFLFVFTAVGSAISARMLTTPDVTSSAGPLVATAVAQAFGLFA  
AVLIAADVSGGHVNPVAVTFAYAI GGRI GVPSAMFYWASQLLGATFACLSLNLF SAGEEVP TTRI AVAMTGF  
GGAVLEGLVTLFLLVYTVHVVGEREPRSRGGDGKREFAATALGALAVGLTQGAFLAAGALTGASMNPARSF  
GPAVVS GHFKNQAVYWAGPMVGA AVALVYQIMACPSVTGNVEAVVV

>OsTIP1;1

MPIRNIAVSGSHQEVYHPGALKAALAEFI STLIFV FAGQSGMAFSKLTGGGATTPAGLIAAAVAHAFALFV  
AVSVGANISGGHVNPVAVTFGAFVGGNITLFRGLLYWIAQLLGSTVACFLLRFS TGGLATGTFGLTGVSVWE  
ALVLEIVMTFGLVYTVYATAVDPKKGSLGTI APIAIGFIVGANILVGGAFDGASMNPVAVSFGPALVSWSWE  
SQWVYWVGPLIGGGLAGVIYEVLFISHTHEQLPTTDY

>OsTIP1;2

MPVSRIAVGAPGELSHPDTAKAAVAEFI SMLIFV FAGSGMAFSKLTGGGTTSPGLIAASLAHALALFV  
AVAVGANISGGHVNPVAVTFGAFVGGNISLVKAVVYVWAQLLGSVVACLLK IATGGA AVGAFSLSAGV GAW  
NAVVF EIVMTFGLVYTVYATAVDPKKGDLGVI APIAIGFIVGANILAGGAFDGASMNPVAVSFGPAVVTGVW  
DNHWVYWLGPVFGAAIAALIYDIIFIGQRPHDQLPTADY

>OsTIP2;1

MVKLAFGSLGDSFSATS VKAYVAEFI ATLLFV FAGVSAIAYGQLTNGGALDPAGLVAIAIAHALALFVGV  
SVAANISGGHLNPAVTFGLAVGGHITILTGLFYWIAQLLGASIACLLLKFVTHGKAIP THGVAGISELEGV  
VMEIIVTFALVYTVYATAADPKKGS LGTI APIAIGFIVGANILAAGPFSGGSMNPARSFGPAVAAGNFAGN  
WVYWVGPLIGGGLAGLVYGDVFIGSYQP VADQDYA

>OsTIP2;2

MSGNIAFRFDDSFSAASLKAYVAEFI STLV FV FAGVSAIAYTKLTGGAPLDPAGLVAVAVCHGFGLFVA  
VAIGANISGGHVNPVAVTFGLALGGQITILTGVFYWIAQLLGAIVGAVLVQFCTGVATPTHGLSGVGFEGV  
VMEIIVTFGLVYTVYATAADPKKGS LGTI APIAIGFIVGANILVAGPFSGGSMNPARSFGPAVASGDY TNI  
WIYWVGPLVGGGLAGLVYRYVYMCGDHAPVASSEF

>OsTIP3;1

MSTAAARPGRRFTVGRSEDATHPDTIRAAISEFLATAIFVFAAEGSILSLGKLYQDMSTPGGLVAVSLAHA  
LALAVAVAVAVNISGGHVNPVAVTFGALLGGRLSIRALFYWLAQLLGAVVATLLLRLTTGGMRPPGFALAS  
GVGDWHAVLLEATMTFGLMYAYYATVIDPKRGHVGTIAPLAVGFLLGANMLAGGPF DGAGMNP ARVFGPAL  
VGWRWRHHWVYWLGPVFGAGLAGL LYEYLVIPSADAAPHGGAHQPLAPEDY

>OsTIP3;2

MLPGRHTPRRADAAAAAAMEPLVPGATRAALSEFVATAVVFVFAAEGSVYGLWKMYRDTGTLGGLLVVAVA  
HALALAAAVAVSRNASGGHVNPVAVTFGVLVGRRI SFARAALYVAAQLLGAVLAVLLLRLASGGMRPMPGFTL  
GHRIHERHALLLEVMTFGLVYTVYATAVDRRS GGDIAPLAIGLVAGANILAGGPF DGAAMNPARAFGPA  
LVGWNWRHHWVYWLGPLIGAGMAGALYEFVMAEQPEPPAAADTRLPVAAEDY

>OsTIP4;1

MAKEVDPCDHGEVVDAGCVRAVLAELVLT FV FV FTGVAATMAAGVPEVAGAAMPMAALAGVAIATALAAGV  
LVTAGFHVSGGHLNPAVTVALLARGHITAFRSALYVAAQLLASSLACILLRYLTGGMATPVHTLGSGIGPM  
QGLVMEIILTFSLLFVYATILDPRSSVPGFGPLL TGLIVGANTIAGGNFSGASMNPARSFGPALATGVWT  
HHWIYWLGPLIGGPLAGLVYESLFLVKR THEPLLDNSF

>OsTIP4;2

MPLLPMTKLELGHGEAWEPGCLRAVAGELLFTFLFVFIGVASTITAGKAAGGAGEAAAVTAAAMAQALVV  
AVLATAGFHVSGGHLNPAVTVSLAVGGHITLFRSALYVAAQLAGSSLACLLLRCLTGGGAATPVHALADGVG  
PVQGVAAEAVFTFTLLL VICATILDPRAAPP GTGPLLTGLLVGANTVAGGALTGASMNPARSFGPALATG  
EWAHHWVYWVGPLAGGPLAVVAYELLFMDVEDAGGAHQPLPQE

>OsTIP4;3

MAKLALGHHREATDPGCLRAVVAELLLTFLFVFSGVGSAMAAAKLGGGGDTIMGLTAVAAAHALVVAVMVS  
AGLHVSGGHINPAVTLGLAAGGHITLFRSALYAAAQLLGS SLACL LLAALTG GEEAVPVHAPAPGVGAARA  
VAMEAVLTF SLLFAVYATVVD RRRRAVGALGPLLVGLVVGANILAGGPYSGASMNPARSFGPALAAGEWADH  
WIYVWGPLIGGPLAGLVYEGLFMGPPGHEPLPRNDGDF

>OsTIP5;1

MANICANMKRCFSPPALRAYFAEFFSTFLFVFIIVGSTISARMLTPDETS DASSLMATAVAQAFGLFAAVF  
IAADVSGGHVNPVAVTFAYAI GGHITVPSAIFYWASQMLG STFACLVLHYI SAGQAVPTTRI AVENTGFGAG  
ILEGLVTFM VVYTVHVAGDPRGGGFGRKGPAA TALGALVVGAVTGACVLAAGSLTGASMNPARSFGPAVV  
SGHYSNQAVYWAGPMVGA AVALVHQALVFPTVPEPAPAPATNESARHGSVQTVVV

>AtTIP1;1

MPIRNIAIGRPDEATRDPALKAALAEFISTLIFV VAGSGSGMAFNKLTENGATTPSGLVAAVAHAFGLFV  
AVSVGANISGGHVNPVAVTFGAFIGGNITLLRGILYWIAQLLGSVVA CLILKFATGGLAVPAFGLSAGVGV  
NAFVFEIVMTFGLVYTVYATAIDPKNGSLGTIAPIAIGFIVGANILAGGAFSGASMNPAVAFGPAVVSWTW  
TNHWVYWAGPLVGGGIAGLIYEVFFINTTHEQLPTTDY

>AtTIP1;2

MPTRNIAIGGVQEEVYHPNALRAALAEFISTLIFV FVAGSGSGIAFNKITDNGATTPSGLVAAALAHAFGLF  
VAVSVGANISGGHVNPVAVTFGVLLGGNITLLRGILYWIAQLLGSVAACFLLSFATGGEP IPAFGLSAGVGS  
LNALVFEIVMTFGLVYTVYATAVDPKNGSLGTIAPIAIGFIVGANILAGGAFSGASMNPAVAFGPAVVSWT  
WTNHWVYWAGPLIGGGLAGLIYDFVVIDENAHEQLPTTDY

>AtTIP1;3

MPINRIAIGTPGEASRPDAIRAAFAEFFSMVIFV FVAGQSGMAYGKLTGDGPATPAGLVAASLSHAFALFV  
AVSVGANVSGGHVNPVAVTFGAFIGGNITLLRAILYWIAQLLGA VVACL LLLK VSTGGMETA AAFSLSYGVTPW  
NAVVFEIVMTFGLVYTVYATAVDPKKGDIGIIAPLAIGLIVGANILVGGAFD GASMNPAV SFGPAVVS WIW  
TNHWVYWVGPFIGAAIAAIVYDTIFIGSNGHEPLPSNDF

>AtTIP2;1

MAGVAFGSFDDSFSLASLRAYLAEFISTLLFV FVAGVGSIAIYAKLTS DAALDTPGLVAIAVCHGFALFVAV  
AIGANISGGHVNPVAVTFGLAVGGQITVITGVFYWIAQLLGS TAACFLLK YVTGGLAVP THSVAAGLGSIEG  
VVMEIIITFALVYTVYATAADPKKGS LGTIAPIAIGFIVGANILAAGPFSGGSMNPARSFGPAVAAGDFS  
GHWVYVWGPLIGGGLAGLIYGNVFMGSSEHVPLASADF

>AtTIP2;2

MVKIEIGSVGDSFSVASLKAYLSEFIATLLFV FVAGVGSALAFAKLTS DAALDPAGLVAVAVAHAFALFVGV  
SIAANISGGHLNPAVTLGLAVGGNITVITGFFYWIAQCLGSIVACL LLLVFTNGESVP THGVAAGLGAIEG  
VVMEIVVTFALVYTVYATAADPKKGS LGTIAPIAIGFIVGANILAAGPFSGGSMNPARSFGPAVVS GDFSQ  
IWIYVWGPLVGGALAGLIYGDVFIGSYAPAPTTESYP

>AtTIP2;3

MVKIEVGSVGD SFSVSSLKAYLSEFIATLLFV FVAGVGS AVAFAKLTS DGALDPAGLV AIAIAHAFALFVGV  
SIAANISGGHLNPAVTLGLAIGGNITLITGFFYWIAQCLGSIVACL LLLVFTNGKSVPT HGVSAGLGAVEG  
VVMEIVVTFALVYTVYATAADPKKGS LGTIAPIAIGFIVGANILAAGPFSGGSMNPARSFGPAVVS GDL SQ  
IWIYVWGPLVGGALAGLIYGDVFIGSYEAVETREIRV

>AtTIP3;1

MATSARRAYGFGRADEATHPDSIRATLAEFLSTFV FVFAAEGSILSLDKLYWEHAAHAGTNTPGGLILVAL  
AHAFALFAAVSAAINVS GGHVNPVAVTFGALVGGRVTAIRAIYYWIAQLLGA I LACL LLLR LTTNGMRPVGFR  
LASVGVAVNGLVLEIILTFGLVYVYSTLIDPKRGS LGTIAPLAIGLIVGANILVGGPFSGASMNPARAFG  
PALVGRWRHHDHVIYVWGPFIGSALAA LIYEYMPI TEPTTHAHGVHQPLAPEDY

>AtTIP3;2

MATSARRAYGFGRADEATHPDSIRATLAEFLSTFVVFVAGEGSILALDKLYWDTAHTGTNTPGGLVLVAL  
AHALALFAAVSAAINVSGGHVNPVTFALIGGRISVIRAIYYWVAQLIGAILACLLRLATNGLRPVGFH  
VASGVSELHGLLMEIILTFALVYVVYSTAIDPKRGSIGIIAPLAIGLIVGANILVGGPFDGASMNPARAFG  
PALVGWRWSNHWIYVWGPFIGGALAALIYEYMIIPSVNEPPHHSTHQPLAPEDY

>AtTIP4;1

MKKIELGHHSEAAKPDCIKALIVEFITTFVVFAGVGSAMATDSL VGNTLVGLFAVAVAHAFVVAVMISAG  
HISGGHLNPAVTLGLLLGGHISVFRFLYWIDQLLASSAACFLLSYLTGGMGTPVHTLASGVSYTQGIWE  
IILTFSLLFVYATIVDPKKGSLDGFGLLTGFVVGANILAGGAFSGASMNPARSFGPALVSGNWDHWVY  
WVGPLIGGLAGFIYENVLIDRPHVPVADDEQPLLN

>AtTIP5;1

MRRMIPTSFSSKFQGVLSMNALRCYVSEFISTFFFVLAAVGSMSSRKL MAGDVSGPFGVLIPAIANALAL  
SSSVYISWNVSGGHVNPVTFAMAVAGRISVPTAMFYWTSQMIA SVMACLVLKVTVMEQHVPIYKIAGEMT  
GFGASVLEGVLAFLVLYTVFTASDPRRGLPLAVGPIFIGFVAGANVLAAGPFSGGSMNPACAFGSAMVYGS  
FKNQAVYVWGP LLGGATAALVYDNVVPVEDDRGSSTGDAIGV

**NIPs**

>HvNIP1;1

MAGGGDNSQTNGGAQEPRAMEEGRKEDYDQGCGLAISLPFVQKIIAEIFGTYFLIFAGCGAVTINKSKGQI  
TFPGVAIVWGLAVMVMVYVSGHISGAHFNPAVTFATVRRFPWRQVPAYVLAQMLGATLASGTLRLMFGG  
RHEHFPGLTPTGSDVQSLVLEFIITFYLMFVIVSGVATDNRAIGELAGLAVGATILLNVLIAGPVSGASMN  
ARTVGPALVGSEYRSIWVYVVGVPVAGAVAGAWAYNLIRFTNKPLREITKSTSFLLRSMSRMNSVSV

>HvNIP1;2

MEPINSRSILINTRIQTRDRDRDRDRQPKKERGMKGESGARMAGGGGEHGANGLQEQDHAGALEEGRG  
GANHPAGCENSEQDLISTSNQPMISVQFVQKVLAEILGTYLLIFAGCAAVAVNKRTAGTVTFPGICITWGL  
AVMVMVYVSGHISGAHLNPAVTLAFATCGRFPWRQVPAYAAAQVVGSTAASLTLRLLLFGSEPEHFFGT  
VPA GSDVQSLVLEFIITFYLMFVIVSGVATDNRAIGELAGLAVGATVLLNVLVAGPISGASMNPARTIG  
PAMVAG RYTSIWLYIVGPISGAVAGAWAYNLIRFTNKPLREITRTGSFLRSARMS

>HvNIP2;1

MSVTSNTPTRANSRVNYSNEIHDLSTVQDGAPSLAPSMYQEKSFADFFPHLLKVKVISELVATFLLV  
FVT CGAASIIYGADVTRVSQLGQSVVGGGLIVTVMIYATGHISGAHMNPAVTLSFACFRHFPW  
IQVPFYWAAQFTG AMCAAFVLRVAVLHPITVLTGTTPTGPHWHALVIEIIVTFNMMFVITCAVAT  
DSRAVGELAGLAVGSAVCITS IFAGPVSGGSMNPARTLAPAVASGVYTG  
LWIYFLGPVIGT LSGAWVYTYIRFEEEPSVKDGPQKLS  
SFKLR RLQSQRSMAVDEFDHFV

>HvNIP5634

MMFVTCAVATDSRAVGELAGLAVGSAVCITSIFAGPVSGGSMNPARTLAPAVASGVYTG  
LWIYFLGPVIGT LSGAWVYTYIRFEEAPS  
VKDGPQKLSFKLRLQSQRSMAVDEFDHFV

>ZmNIP1;1

MAGGGDHSQTNGGHVDQRALEEGRKEEFADQGCAMVVSVPFIQKIIAEIFGTYFLMFAGCGAVTINASKN  
GQITFPGVAIVWGLAVMVMVYAVGHISGAHFNPAVTLAFATSGRFPWRQLPAYVLAQMLGATLASGTLRLM  
FGGRHEHFPGLTPTGSEVQSLVIEIITFYLMFVIVSGVATDNRAIGELAGLAVGATILLNVLIAGPVSGAS  
MNPARSVGPALVSGEYTSIWVYVVGPPVAVAGAWAYNLIRFTNKPLREITKSTSFLLKSTSRMNSAASA

>ZmNIP2;1

MSTNSRSNSRANFNNEIHDIGTAQNSSMPPTYDRSLADIFPPHLKVKVSEVVSTFLLV  
FVTCGAAGIYGDSDKDRISQLGQSVAGGLIVTVMIYAVGHISGAHMNPAVTLAFAVFRHFPW  
IQVPFYWAAQFTG SICASFVL KAVLHPIAVLGT  
TTPTGPHWHSLVIEIIVTFNMMFVTLAVATDTRAVGELAGLAVGSAVCITSIFAGAVSG  
GSMNPARTLGPALASNYTGLWIYFLGPVLT  
LSGAWTYTYIRFEEAPSHKDMSQKLSFKLRLQSQSVA  
VDDDEL  
DHIQV

>ZmNIP2;2

MAAASSTTSRTNSRVNYSNEIHDLSTVQSGSVVPTLFYDPKSIADIFPPHLGKKVISEVVATFLLV  
FVTCGA ASIYGEDNRRISQLGQSVAGGLIVTVMIYATGHISGAHMNPAVTLSFACFRHFPW  
IQVPFYWAAQFTGAMC AAFVLKAVLHPIAVIG  
TTTTPSGPHWHALLIEIVVTFNMMFVTCAVATDSRAVGELAGLAVGSAVCITSIFA  
GPVSGGSMNPARTLAPAVASNVFTGLWIYFLGPVIGT  
LSGAWVYTYIRFEEAPAAKDTQRLSSFKLRRMQS  
QLAADEFDTV

>ZmNIP2;3

MAAASSTTSRTNSRVNYSNEIHDLSTVQGGSA  
AAAAAALFYDPKSIADIFPPHLGKKVISEVVATFLLV  
FVT CGAASIIYGEDNARISQLGQSVAGGLIVTVMIYATGHISGAHMNPAVTLSFACFRHFPW  
IQVPFYWAAQFTG AMCAAFVLKAVLQPIAVIG  
TTTTPSGPHWALAIEIVVTFNMMFVTCAVATDSRAVGELAGLAVGSAVCITS  
IFAGPVSGGSMNPARTLAPAVASNVFTGLWIYFLGPVVG  
T LSGAWVYTYIRFEEAPAAKPD  
TQRLSSFKL RRMQSQSALAADEFDTV

>ZmNIP3;1

MEPGSTPPNGSAPATPGTPAPLFSGGPRVDSLSEYERKSMRCKCLPLPAVEGWGVATHTCVVEIPAPDVS  
LTKLGAEFVGTFLIFFATAAPIVNQKYGGAI SPFGNAACAGLAVATVILSTGHISGAHLNPSLTIAFAA  
LRHFPWLQVPAYVAVQALASVCAAFALKGVFHPFLSGGVTVPDATVSTAQAFFTEFII SFNLLFVVTAVAT  
DTRAVGELAGIAVGAAVTLNILVAGPTTGGSMNPVRTLGPAVAAGNYRQLWIIYLLAPTLGALAGASVYKAV  
KLRDENGETPRQRSFR

>OsNIP1;1

MAGGDNNSQTTNGGSGHEQRAMEEGRKQEEFAADGQCGCLAFVSPFIQKIIAEIFGTYFLIFAGCGAVTIN  
QSKNGQITFPVAVI VWGLAVMVMVYAVGHISGAHFNPAVTLAFATCRRFPWRQVPAYAAAQMLGATLAAGT  
LRLMFGGRHEHFPGLPAGSDVQSLVLEFIIITFYLMFVIVSGVATDNRAIGELAGLAVGATILLNVL IAGPI  
SGASMNPARSLGPAMIGGEYRSIWVYIVGPVAVAGAWAYNIIRFTNKPLREITKSGSFLKSMNRMSST

>OsNIP1;2

MAGREDGAAAGAMEEGQDSKEVKCESSEDSGSSSSSRCHGNDVIVSQFMQKVHPWCMCMNKNLLILAEIL  
GTYFMIFAGCGAVVVNQSTGGAVTFPGICAVWGLVVMVLVYTVSHISGAHFNPAVTVAFATCGRFRWKQVP  
SYVVAQVLGSTMASLTLRVVFGGGGGGARGEHLFFGTTAGSMAQAAALEFVIVSFFLMFVVSGVATDNRAI  
GELAGLAVGATVAVNVLFAGPVTGASMNPARSLGPAMVAGRYGGVWVYVAAPVSGTVCGAWAYNLLRFTDK  
PLRDIANTASFLRRSSRRS

>OsNIP1;3

MAGGEHGVNGQHEETRAMEEGSRDHQARCENSEQDGGSKSSSNHMPFSVQFAQKVIAEILGTFFLIFAGC  
AAVAVNKRTGGTVPFGICITWGLAVMVMVYVSGHISGAHLNPAVTLAFATCGRFPWRRVPAYAAAQVAGS  
AAASAALRALFGGAPEHFFGTAPAGSDVQSLAMEFIIITFYLMFVVSGVATDNRAIGELAGLAVGATVLVNV  
LFAGPISGASMNPARTIGPAIILGRYTGIWVYIAGPVFVAVAGAWAYNLIIRFTDKPLREITMTASFIRSTR  
RN

>OsNIP1;4

MARREVDSDYTNNGSVVEVVSIEEGSKMDKEDDHQNPQAPDGGDVVVCMPMSFTFLQMLLAEFLATFFLMF  
AGLGAITVEEKKGAVTFPGVAVAWGAAMVAVGHVSGAHLNPAVTLGFVAVAGRFPWRRAPAYALAQTA  
ATAASVVLRLMFGGRHAPVPATLPGGAHQSLVIEFVITFYLMFVIMAVATDDQAVGHMAGVAVGGT IML  
NVLFAGPVVSGASMNPARSIGPALVGSKYTALWVYILGPFAGAAAGAWAYSLIRLTGDRTD

>OsNIP2;1

MASNNSRTNSRANYSNEIHDLSTVQNGTMPTMYGKAIADFFPPHLLKVVSEVVATFLLVFMTCGAAGI  
SGSDLRSISQLGQSIAGGLIVTVMIIYAVGHISGAHMNPAVTLAFVFRHFPWIQVPFYWAAQFTGAICASF  
VLKAVIHPVDVIGTTTTVPVPHWHSVVEVIVTFNMMFVTLAVATDTRAVGELAGLAVGSAVCITSIFAGAI  
SGGSMNPARTLGPALASNKFDGLWIIYFLGPVMTLSGAWTYTIFRFDTPKEGSSQKLSFFKLRLRSQSS  
IAADDVDEMENIQV

>OsNIP2;2

MASTTAPSRTNSRVNYSNEIHDLSTVQSVSAVPSVYYPEKSFADIFPPNLLKVI SEVVATFLLVFTCGA  
ASIYGEDMKRISQLGQSVVGGGLIVTVMIIYATGHISGAHMNPAVTL SFAFFRHFPIQVPFYWAAQFTGAMC  
AAFVLRVAVLYPIEVLGTTTTPTGPHWALVIEIVVTFNMMFVTCVATDSRAVAGLAVGSVAVCITSIFA  
GPVSGGSMNPARTLAPAVASNVYTGLWIIYFLGPVVTLSGAWVYTYIRFEEAPAAAGGAAPQKLSFFKLRR  
LQSQSMAADEFDNDV

>OsNIP3;1

MEMAAPNGGGAAGMSSPVNGASAPATPGTPAPLFAGRVDSLSEYERKSMRCKCLPAVAEAWAPSAHGCV  
VEIPAPDVS LTKLGAEFVGTFLIFFATAAPIVNQKYGGAI SPFGNAACAGLAVTTIILSTGHISGAHLN  
PSLTIAFAALRHFPWLQVPAYVAVQVLGSI CAGFALKGVFHPFLSGGVTVPDPTI STAQAFFTEFIIITFNL  
LFVVTAVATDTRAVGELAGIAVGAAVTLNIIAGPTTGGSMNPVRTLGPAVAAGNYRQLWIIYLIAPTLGAV  
AGAGVYTAVKLRDENGETPRQRSFR

>OsNIP3;2

MEGGKMSMGMDAASASVTVPPMQMAGDQSNRIAI IISPRAGSSKILPFELVNGAANAGSQRHADPAEST  
PEAHHLWHPVDLPKIKPPVPLVKKVGAEFFGTFTLIFTVLSTIIMDEQHKGVESLLGIATSAGLAVTVLV  
LSLIHISGCHLNPAVSIAMTVFGHLPPAHLPLPYIAAQILGSITASFVKGMYHPVNPPIVTVPKVGTVEAF

FLEFVTTTFVLLFIITALATDPNAVKELIAVAVGATIMMNALVAGPSTGASMNPARTLGPATGRYTQIWW  
YLVATPLGAVAGEGFYFAIKL

>OsNIP3;3

MEGHKSGMEAVAVAIPLHTGESNHRIDSNVSSQCHADPAELSDETQQQSLWHLGLRKIIPSSVPLLKKVS  
AEFFGTFILIFTVLSTIIMDEQHKSIEITLLGIATSAGLAVTVLVLSLIHISGCHLNPAISIAMAVFGHLPS  
AHLPPYISSQILGAVAASFAVKGLYHPVNPVGTVEAFFVEFIIITFFLLFIITALATDPNAVKEL  
IAVAVGATVMMNILVAGPSTGASMNPARTIGAAIATGRYTQIWWYLVATPLGAIAGTGAYVAIKL

>OsNIP4;1

MTTDHAGKKVDVVVGNVDGEHVGEQARHDLHEEAAAAAADHHATRGLAIGFLIREVMVEGLASFLVVF  
WSCVAALMQEMYGTLTFPMVCLVAMTVAFVLSWLGP AHFNPAVTITFAAYRRFPVWPKLPLYVAAQLAGS  
LLACL SVNAV MRPRHDH FYGTAPVVVHGTRL PFLMEFLASAVLMIVIATVATDGTAGKT VGGIAIGA AVGG  
LGLVIGPVS GSGSMN PARTLGP AIVLGRYDGVWIYV VAPVAGMLV GALCNRAVRLSHRIVAF LCGTSVGIAG  
SP

>AtNIP1;1

MADISGNGYGNAREEVVMVNLKDEVEHQEMEDIHNPRLKKQDSLLSVSVPFLQKLI AEFLGTYFLVFTG  
CASVVNMQNDNVVTLPGIAI VWGLTIMVLIYSLGHI SGAHINPAVTIAFASCGRFPLKQVPAYVISQVIG  
STLAAATLRLFLGLDHDVCSGKHDFVIGSSPVGSDLQAF TMEFIVTFYLMFIIISGVATDNRAIGELAGLAI  
GSTVLLNVLIAAPVSSASMNPGRSLGPALVYG CYKIWIYLVAPT LGAIAGAWVYNTVRYTDKPLREITKS  
GSFLKTVRIGST

>AtNIP1;2

MAEISGNGGDARDGAVVVNLKEEDEQQQQQQA IHKPLKKQDSLLSISVPFLQKLMAEVLGTYFLIFAGCAA  
VAVNTQHDKAVTLPGIAI VWGLTVMVLVYSLGHI SGAHFNPAVTIAFASCGRFPLKQVPAYVISQVIGSTL  
AAATLRLFLGLDQDVCSGKHDFVGTLP SGNLQSFVIEFIIITFYLMFVISGVATDNRAIGELAGLAVGST  
VLLNVI IAGPVS GASMNPGRSLGPAMVYSCYRGLWIIYVSPIVGAVSGAWVYNMVRYTDKPLREITKSGSF  
LKTVRNGSSR

>AtNIP2;1

MDDISVSKSNHGNVVVLNIKASSLADTSLPSNKHESSPPLLSVHFLQKLLAELVGTYYLIFAGCAAIAVN  
AQHNHVTVLGVIAVWVGI VIMVLVYCLGHL SAHFNPAVTLALASSQRFPLNQVPAYITVQVIGSTLASATL  
RLLFDLNDVCSKKHDFVFLGSSPSGSDLQAFVMEFIIITGFLMLVVCVTTTKRTTEELEGLIIGATVTLNV  
IFAGEVSGASMNPARSIGPALVWGCYKIWIYLLAPT LGAVSGALIHKMLPSIQNAEPEFSKTS SHKRVT  
DLPL

>AtNIP3;1

MIFAGCSAIVVNETYKPVTLPGIALVWGLVVTVMIIYSIGHVSGAHFNPAVSI AFASSKKFPFNQVPGYIA  
AQLLGSTLAAAVLRLVFLHDDDDVCSLKG DVYVGTYP SNSNTTSFVMEFIATFNLMFVISAVATDKRATGSF  
AGIAIGATIVLDILFSGPISGASMNPARSLGPALIWGCYKDLWLYIVSPVIGALS GAWTYGLLRSTKKSYS  
EII RPNCKVSSRDRQEASQDEICVLRVVD PANQNYFICSSPTDINGKCNVTCKLA

>AtNIP4;1

MSSHSDIEIEEQISRIEKGKGDQCQGGIETVICTSPSIVCLTQKLI AEMIGTYFIVFSGCGVVVVNVLYGG  
TITFPGICVTWGLIVMVMIIYSTGHISGAHFNPAVTVTFAIFRRFPWHQVPLYIGA QFAGSLLASLTLRLMF  
KVTPEAFFGTT PADSPARALVAEIIISFLLMFVISGVATDNRAV GELAGIAVGMTIMVNVFVAGPISGASM  
NPARSLGPALVMGVYKHIWVYIVGPVLGVISGGFVYNLIRFTDKPLRELTKSASF LRAVSPSHKGS SSKT

>AtNIP4;2

MTSHGEEIEDEQISRIEKGKCKDSQGGMETAICSSPSIVCLTQKLI AEMIGTYFIIIFSGCGVVVVNVLYGG  
TITFPGICVTWGLIVMVMIIYSTGHISGAHFNPAVTVTFAVFRFPWYQVPLYIGA QLTGSLASLTLRLMF  
NVTPKAFFGTTPTDSSGQALVAEIIISFLLMFVISGVATDSRATGELAGIAVGMTIILNVFVAGPISGASM  
NPARSLGPALVIMGRYKIWIWYIVGPFVGFIFAGGFVYNFMRF TDKPLRELTKSASF LRSVAQKDNASKSDG

>AtNIP5;1

MAPPEAEVAVMVMAPPTPGTPTGGPLITGMRVDSMSFDHRKPTPRCKCLPVMGSTWQHDTCFTDFPS  
 PDVSLTRKLGAEFVGTFLIFTATAGPIVNQKYDGAETLIGNAACAGLAVMI I I LSTGHI SGAHLNPSLTI  
 AFAALRHFPWAHVPAIYIAAQVSASICASFALKGVFHFFMSGGVTIPSVSLGQAFALEF I I T F I L L F V V T A V  
 ATDTRAVGELAGI AVGATVMLN I L V A G P S T G G S M N P V R T L G P A V A S G N Y R S L W V Y L V A P T L G A I S G A A V Y T  
 GVKLND SVTD P P R P V R S F R R

>AtNIP6;1

MDHEEIPSTPSTPATTPTGAPLFGGFEGKRNGHNGRYTPKSLLKSCCKCF SVDNEWALEDGRLPPVTC SL  
 PPPNVSLYRKLGAEFVGTFLIFAGTATAIVNQKT DGAETLIGCAASAGLAVMIVILSTGHI SGAHLNPAV  
 TIAFAALKHFPWKHVPIYIGAQVMASVSAAFALKAVFEPTMSGGVTVP TVGLSQAFALEF I I S F N L M F V V T  
 AVATDTRAVGELAGI AVGATVMLN I L I A G P A T S A S M N P V R T L G P A I A A N N Y R A I W V Y L T A P I L G A L I G A T  
 Y T I V K L P E E D E A P K E R R S F R R

>AtNIP7;1

MNGEARSRVVDQEAGSTPSTLRDEDHPSRQRLFGLPYDIDLNPLRIVMAELVGTFILMFSVCGVISSTQL  
 SGGHVGLLEYAVTAGLSVVVVVYSIGHISGAHLNPSITIAFAVFGGF PWSQVPLYITAQTLGATAATLVGV  
 SVYGVNADIMATKPALSCVSAFFVELIATSIVVFLASALHCGPHQNLGNLTGFVIGTVISLGLVITGPI SG  
 GSMNPARSLGPAVVAWDFEDLWIYMTAPVIGAIIGVLTYSISLKRPCSPVSPSVSSLLR

## SIPs

>HvSIP1;1 (contig6340)

MAMGAAVREAAADGVVTF LWVLCVSTLGASTAAVT TYLSLHEGIHYALLVTVSILALLLFAFNLLCDALGG  
 ASFNPTGVAAFYAAGLTSPSLFSIALRLPAQAAGAVGGALAI SELMPEQYKHM LGGPSLKVDPHTGAAAEG  
 VLT F V I T F A V L C I I V K G P R N P I V K T A M L S V S T V S L V L T G A A Y T G P S M N P A N A F G W A Y V N N Q H N T W E Q L Y V Y  
 W I C P F I G A I L A A W T F R A V F P P P A P K P K T K K A

>HvSIP2;1 (contig19630) [partial sequence]

GGPALYLF TVFVRVPAQVIGAVIGVMLMRFAFPKVGKGAALNVGVHGHALTEGLATLMVVMVSLTLKKKEQ  
 GFFVKTWIASIWKMTIHILSSDITGGIMNPASAF AWAYARGDHTSFDHLLVYWLAPLQATLVGVVVVTF LT

>ZmSIP1;1

MAMGATVRAAAADAVVTF LWVLCASALGASTAAVTSYLG VQEGAGHYALLVTTSLLSVLLFTFDLLCGALG  
 GASFNPTDFAASYAAGLDSPSLFSVALRFPQAAGAVGGALAI SELMPAQYKHTLAGPSLKVDPHTGALAE  
 GVLTFVITLTVLWVIVKGRNVILKTLTLLSTSIVSVILAGAEYTGPSMNPANAFGWAYVNNWHNTWEQLYV  
 YWICPFIGAMLAGWIFRVVFLPPAPKPKTKKA

>ZmSIP1;2

MAMGEALRAAAADAVVTF LWVLCVSTLGASTTAVTSYLR LQGVHFALLVTVSLLSVLLFVFNILCDALGGA  
 SFNPTGVAAFYAAGVTSPSLFSIALRLPAQAAGAVGGALAI SELMPAQYRHMLGGPSLKVDPHTGAGAELV  
 LTFVITLAVLLIIVKGRNPIIKTWMISICTLCLVLSGAAYTGPSMNPANAFGWAYVNNRHNTWEQFYVY  
 ICPFIGAILAAWIFRAMFLT PPPKPKAKKA

>ZmSIP2;1

MSPAPSRPRIRPWL VVGDLALAAAWVCAGALVKLLVYGG LGLGGRPEAEAVKVSLSLVYMF LFAWLEAASG  
 GASYNPLTVLAAALASHGGPAVYLF TAFARIPAQVIGAVLGVKLIQVTFPNVGKGARLSVGAHHGALAEGL  
 ATFMVVMVSVTLKKKEMKSF FMKTWITSIWKN TIHLLSSDITGGIMNPASAF AWAYARGDHTTFDHL L V Y W  
 LAPLQATLLGVWAVTFFT KPKKIKEQKV DENKIKKE

>OsSIP1;1

MAVAAVRAAAADA VVTF LWVLCVSTLGASTAAVTSYLR IHEGIHYALLVTVSLLSVLLF AFNLLCDALGGA  
 SFNPTALAAFHAAGLSSPRHSSLFPLALRFPQAAGAVGGAMA I SELMPEQYKHM LGGPSLKV DLHTGAAA  
 ELVLT F V I T L A V L W I I V K G P R N P I V K T W M L S I S T V C L V L T G A A Y T G P S M N P A N A F G W A Y V N N R H N T W E Q F Y  
 V Y W I C P F V G A V L A A W V F R A V F P P P A P K P K A K K A



>OsSIP2;1

MSPAPPPSRGRIRPWLVVGD LVVAAMWVCAGALVKLAVYGV LGLGGRPEADAVKVALSLVYMFFF AWLEGF  
TGGASYNPLTVLAGALASRAGPSLYLFAAFVRMPAQVFGSILGVKLIRAALPKVGKGAPLSVGVHHGALAE  
GLATFMVVIVSVTLKKKEMKGF FMKTISSIWKMTFHLLSSDITGGVMNPASAF AWAYARGDHTTTFDHL LV  
YWLAPLQATLLGVVVVTL LTKPKKIEEEEADES KTKKE

>AtSIP1;1

MMGVLKSAIGDMLMTFSWVVL SATFGIQTAAIISAGDFQAITWAPLVILTSLIFVYVSIFTVIFGSASFNP  
TGSAAFYVAGVPGDTLFLSLAIRLPAQAIGAAGGALAIMEFIPEKYKHMIGGPSLQVDVHTGAI AETILSFG  
ITFAVLLIILRGPRLLAKTFLLALATISFVVAGSKYTG PAMNPAIAFGWAYMYSSHNTWDHIYVYWISS F  
VGALSAALLFRSIFPPRPQKKKQKKA

>AtSIP1;2

MSAVKSALGDMVITFLWVILSATFGIQTAAIVSAVGFHGITWAPLVISTLVV FVSISIFTVIGNVLGGASF  
NPCGNAAFYTAGVSSDSLFLAIRSPAQAIGAAGGAITIMEM IPEKYKTRIGGKPSLQFGAHNGAISEVVL  
SFSVTFLVLLIILRGPRLLAKTFLLALATVSVFVVGSKFTRPFMNPAIAFGWAYIYKSHNTWDHFYVYWI  
SSYTGAILSAMLFRIIFPAPPLVQKKQKKA

>AtSIP2;1

MGRIGLVVTDLVLSFMWIWAGVLVNILVHGVLGFSRTDPSGEIVRYLFSIISMFI FAYLQQATKGGLYNPL  
TALAAGVSGGFSSFIFSVFVRIPVEVIGSILAVKHIIHV FPEIGKGPKNVAIHHGALTEGILTFFIVLLS  
MGLTRKIPGSFFMKTWIGSLAKLTLHILGSDLTGGCMNPAAVMGWAYARGEHITKEHLLVYWLGPVKATLL  
AVWFFKVVFKPLTEEQEKPKAKSE

**SUPPLEMENTARY FILE S3**

*Differential expression of membrane intrinsic proteins (MIPs) between developmental regions of leaf three of barley as revealed by microarray analysis.*

**Table S3.** *Differential expression of membrane intrinsic proteins (MIPs) between developmental regions of leaf three of barley as revealed by microarray analysis.*

| Probe              | MIP        | EZ<EB | EZ>EB | EZ<NE | EZ>NE | EB>NE | EB<NE |
|--------------------|------------|-------|-------|-------|-------|-------|-------|
| Contig1226         | <b>PIP</b> |       |       |       |       |       |       |
| Contig1239_s_at    |            |       |       |       |       |       |       |
| Contig1219_s_at    |            |       |       |       |       |       |       |
| Contig1228_s_at    |            |       |       |       |       |       |       |
| Contig1230_at      |            |       |       |       |       |       |       |
| Contig1235_at      |            |       |       |       |       |       |       |
| Contig1242_at      |            |       |       |       |       |       |       |
| Contig1237_s_at    |            |       |       |       |       |       |       |
| Contig1225_s_at    |            |       |       |       |       |       |       |
| Contig1223_at      |            |       |       |       |       |       |       |
| HV_CEb0007N06r2_at |            |       |       |       |       |       |       |
| Contig1222_s_at    |            |       |       |       |       |       |       |
| Contig1240_at      |            |       |       |       |       |       |       |
| Hv08C12u_x_at      |            |       |       |       |       |       |       |
| Contig1216_s_at    |            |       |       |       |       |       |       |
| Contig19393_at     |            |       |       |       |       |       |       |
| HS07J06u_x/s_at    | <b>TIP</b> |       |       |       |       |       |       |
| HS18A22u_at        |            |       |       |       |       |       |       |
| Contig1309_at      |            |       |       |       |       |       |       |
| HVSMEf0019H18r2_at |            |       |       |       |       |       |       |
| Contig1310_at      |            |       |       |       |       |       |       |
| Contig1308_at      |            |       |       |       |       |       |       |
| Contig1315_s_at    |            |       |       |       |       |       |       |
| HT03K14r_(s)_at    |            |       |       |       |       |       |       |
| Contig3772_at      |            |       |       |       |       |       |       |
| Contig7377_at      |            |       |       |       |       |       |       |
| HF03B07r_at        |            |       |       |       |       |       |       |
| AF254799_CDS-2_at  |            |       |       |       |       |       |       |
| Contig14229_at     | <b>NIP</b> |       |       |       |       |       |       |
| Contig19214        |            |       |       |       |       |       |       |
| Contig5632_at      |            |       |       |       |       |       |       |
| Contig5634_at      |            |       |       |       |       |       |       |
| Contig6339_s_at    | <b>SIP</b> |       |       |       |       |       |       |
| Contig19630_at     |            |       |       |       |       |       |       |

Differences in expression between leaf regions were analysed by the RankProduct method, which ranks genes according to being the most (RankProduct 1) differentially expressed gene of all >21,000 sequences on the chip. To simplify presentation of data, Rank Products are classified into three groups: RankProduct < 50 (red); 50-700; (dark pink); >700 (light pink); EZ, NE, EB, elongation zone, non-elongation zone and emerged-blade; '<', '>', expression lower (<) or larger (>) in leaf region listed first.

## SUPPLEMENTARY FILE S4

*qPCR data of the expression of candidate barley MIPs in different leaf regions, together with their statistical analysis*

**Table S4a.** *Expression of PIP family members in different leaf regions of barley.*

| Gene     | Leaf region   |        |              |       |              |       |              |       |              |       |
|----------|---------------|--------|--------------|-------|--------------|-------|--------------|-------|--------------|-------|
|          | EZ            |        | NEZ          |       | EmBL         |       | L2           |       | Sheath       |       |
|          | Means         | SD     | Means        | SD    | Means        | SD    | Means        | SD    | Means        | SD    |
| HvPIP1;1 | <b>7.30</b>   | 1.42   | <b>3.55</b>  | 0.91  | <b>1.14</b>  | 0.56  | <b>2.02</b>  | 0.34  | <b>3.37</b>  | 0.31  |
| HvPIP1;2 | <b>0.003</b>  | 0.005  | <b>0.004</b> | 0.004 | <b>0.010</b> | 0.016 | <b>0.005</b> | 0.005 | <b>0.152</b> | 0.167 |
| HvPIP1;3 | <b>0.49</b>   | 0.11   | <b>1.66</b>  | 0.03  | <b>2.93</b>  | 1.21  | <b>7.54</b>  | 1.57  | <b>5.73</b>  | 1.22  |
| HvPIP1;4 | <b>0.000</b>  | 0.000  | <b>0.013</b> | 0.019 | <b>0.026</b> | 0.032 | <b>0.267</b> | 0.290 | <b>0.158</b> | 0.141 |
| HvPIP1;5 | <b>0.106</b>  | 0.008  | <b>0.036</b> | 0.002 | <b>0.007</b> | 0.000 | <b>0.005</b> | 0.000 | <b>0.056</b> | 0.017 |
| TOTAL    | <b>7.90</b>   | 1.38   | <b>5.26</b>  | 0.93  | <b>4.11</b>  | 1.70  | <b>9.84</b>  | 2.09  | <b>9.47</b>  | 1.52  |
|          |               |        |              |       |              |       |              |       |              |       |
| HvPIP2;1 | <b>0.009</b>  | 0.004  | <b>0.077</b> | 0.029 | <b>0.064</b> | 0.040 | <b>0.245</b> | 0.103 | <b>0.069</b> | 0.010 |
| HvPIP2;2 | <b>1.40</b>   | 0.24   | <b>0.27</b>  | 0.05  | <b>0.02</b>  | 0.01  | <b>0.01</b>  | 0.00  | <b>0.32</b>  | 0.12  |
| HvPIP2;3 | <b>0.018</b>  | 0.020  | <b>0.096</b> | 0.048 | <b>0.115</b> | 0.076 | <b>0.233</b> | 0.095 | <b>0.052</b> | 0.011 |
| HvPIP2;4 | <b>0.007</b>  | 0.002  | <b>0.190</b> | 0.016 | <b>0.458</b> | 0.096 | <b>0.496</b> | 0.058 | <b>0.450</b> | 0.022 |
| HvPIP2;5 | <b>13.27</b>  | 2.34   | <b>4.61</b>  | 0.69  | <b>1.31</b>  | 0.11  | <b>1.71</b>  | 0.26  | <b>8.29</b>  | 0.45  |
| HvPIP2;7 | <b>0.0014</b> | 0.0016 | <b>0.086</b> | 0.027 | <b>0.339</b> | 0.098 | <b>0.231</b> | 0.033 | <b>0.010</b> | 0.003 |
| TOTAL    | <b>14.70</b>  | 2.60   | <b>5.32</b>  | 0.70  | <b>2.31</b>  | 0.26  | <b>2.92</b>  | 0.34  | <b>9.18</b>  | 0.33  |

Expression was analysed by qPCR, and average  $2^{-(\Delta Ct)}$  values, compared to the average expression of three reference genes, for (n=) three batches of plants are shown, together with standard deviations (SD); LD, limit of detection or not detectable; EZ, NEZ, EmBL, elongation zone, non-elongation zone and emerged-blade portion of the growing leaf three; L2, Sheath, mature blade and sheath of leaf two; LD, limit of detection or not detectable.

**Table S4b.** *Percent contribution to total expression of PIP1s and PIP2s of individual PIP isoforms in different leaf regions of barley.*

| Gene     | Leaf region |      |             |      |             |     |             |      |             |      |
|----------|-------------|------|-------------|------|-------------|-----|-------------|------|-------------|------|
|          | EZ          |      | NEZ         |      | EmBL        |     | L2          |      | Sheath      |      |
|          | Means       | SD   | Means       | SD   | Means       | SD  | Means       | SD   | Means       | SD   |
| HvPIP1;1 | <b>92.2</b> | 2.4  | <b>66.8</b> | 5.5  | <b>27.0</b> | 4.3 | <b>20.6</b> | 1.0  | <b>35.9</b> | 3.0  |
| HvPIP1;2 | <b>0.04</b> | 0.06 | <b>0.08</b> | 0.09 | <b>0.4</b>  | 0.8 | <b>0.1</b>  | 0.0  | <b>1.5</b>  | 1.5  |
| HvPIP1;3 | <b>6.4</b>  | 2.2  | <b>32.2</b> | 5.6  | <b>71.3</b> | 3.0 | <b>76.7</b> | 2.5  | <b>60.2</b> | 3.8  |
| HvPIP1;4 | <b>0.0</b>  | 0.0  | <b>0.21</b> | 0.30 | <b>1.1</b>  | 1.6 | <b>2.5</b>  | 2.4  | <b>1.9</b>  | 1.8  |
| HvPIP1;5 | <b>1.4</b>  | 0.3  | <b>0.7</b>  | 0.1  | <b>0.2</b>  | 0.1 | <b>0.05</b> | 0.01 | <b>0.6</b>  | 0.1  |
| TOTAL    | <b>100</b>  | 0    | <b>100</b>  | 0    | <b>100</b>  | 0   | <b>100</b>  | 0    | <b>100</b>  | 0    |
|          |             |      |             |      |             |     |             |      |             |      |
| HvPIP2;1 | <b>0.1</b>  | 0.0  | <b>1.4</b>  | 0.4  | <b>2.7</b>  | 1.6 | <b>8.2</b>  | 3.0  | <b>0.8</b>  | 0.1  |
| HvPIP2;2 | <b>9.5</b>  | 0.3  | <b>5.0</b>  | 0.9  | <b>0.6</b>  | 0.3 | <b>0.30</b> | 0.17 | <b>3.5</b>  | 1.4  |
| HvPIP2;3 | <b>0.11</b> | 0.11 | <b>1.9</b>  | 1.2  | <b>4.8</b>  | 2.6 | <b>8.0</b>  | 3.3  | <b>0.6</b>  | 0.1  |
| HvPIP2;4 | <b>0.05</b> | 0.01 | <b>3.6</b>  | 0.8  | <b>19.8</b> | 2.7 | <b>17.0</b> | 1.0  | <b>4.9</b>  | 0.2  |
| HvPIP2;5 | <b>90.3</b> | 0.3  | <b>86.4</b> | 2.0  | <b>57.6</b> | 9.2 | <b>58.5</b> | 5.5  | <b>90.2</b> | 1.6  |
| HvPIP2;7 | <b>0.0</b>  | 0.0  | <b>1.6</b>  | 0.5  | <b>14.5</b> | 2.9 | <b>8.0</b>  | 1.9  | <b>0.11</b> | 0.03 |
| TOTAL    | <b>100</b>  | 0    | <b>100</b>  | 0    | <b>100</b>  | 0   | <b>100</b>  | 0    | <b>100</b>  | 0    |

Percentages were calculated from individual values (n=3 experiments) used to calculate means shown in Table S4a. Those PIPs which make the highest contribution to the total expression of each PIP subfamily are highlighted in red; those PIPs which make the second, or, or joint second highest contribution are highlighted in pink; LD, limit of detection or not detectable; EZ, NEZ, EmBL, elongation zone, non-elongation zone and emerged-blade portion of the growing leaf three; L2, Sheath, mature blade and sheath of leaf two.

**Table S4c.** *Expression of TIP family members in different leaf regions of barley.*

| Gene     | Leaf region  |      |              |      |             |      |             |      |              |       |
|----------|--------------|------|--------------|------|-------------|------|-------------|------|--------------|-------|
|          | EZ           |      | NEZ          |      | EmBL        |      | L2          |      | Sheath       |       |
|          | Means        | SD   | Means        | SD   | Means       | SD   | Means       | SD   | Means        | SD    |
| HvTIP1;1 | <b>54.72</b> | 3.00 | <b>23.65</b> | 3.30 | <b>3.96</b> | 0.25 | <b>2.68</b> | 1.17 | <b>37.29</b> | 11.77 |
| HvTIP1;2 | <b>0.01</b>  | 0.00 | <b>0.58</b>  | 0.11 | <b>0.92</b> | 0.39 | <b>1.77</b> | 0.45 | <b>0.46</b>  | 0.10  |
| HvTIP2;1 | <b>LD</b>    |      | <b>LD</b>    |      | <b>LD</b>   |      | <b>LD</b>   |      | <b>LD</b>    |       |
| HvTIP2;2 | <b>LD</b>    |      | <b>LD</b>    |      | <b>LD</b>   |      | <b>LD</b>   |      | <b>LD</b>    |       |
| HvTIP2;3 | <b>1.34</b>  | 0.36 | <b>0.80</b>  | 0.32 | <b>0.02</b> | 0.02 | <b>0.12</b> | 0.18 | <b>3.29</b>  | 0.48  |
| HvTIP3;1 | <b>LD</b>    |      | <b>LD</b>    |      | <b>LD</b>   |      | <b>LD</b>   |      | <b>LD</b>    |       |
| HvTIP4;1 | <b>0.02</b>  | 0.01 | <b>1.55</b>  | 0.26 | <b>2.93</b> | 0.95 | <b>3.15</b> | 1.19 | <b>4.71</b>  | 2.06  |
| HvTIP5;1 | <b>LD</b>    |      | <b>LD</b>    |      | <b>LD</b>   |      | <b>LD</b>   |      | <b>LD</b>    |       |
| TOTAL    | <b>56.09</b> | 3.23 | <b>26.58</b> | 2.87 | <b>7.84</b> | 1.14 | <b>7.71</b> | 1.53 | <b>45.75</b> | 11.18 |

Expression was analysed by qPCR, and average  $2^{-(\Delta Ct)}$  values, compared to the average expression of three reference genes, for (n=) three batches of plants are shown, together with standard deviations (SD); LD, limit of detection or not detectable; EZ, NEZ, EmBL, elongation zone, non-elongation zone and emerged-blade portion of the growing leaf three; L2, Sheath, mature blade and sheath of leaf two.

**Table S4d.** *Percent contribution to total expression of TIPs of individual TIP isoforms in different leaf regions of barley.*

| Gene     | Leaf region  |       |             |      |              |      |              |      |             |      |
|----------|--------------|-------|-------------|------|--------------|------|--------------|------|-------------|------|
|          | EZ           |       | NEZ         |      | EmBL         |      | L2           |      | Sheath      |      |
|          | Means        | SD    | Means       | SD   | Means        | SD   | Means        | SD   | Means       | SD   |
| HvTIP1;1 | <b>97.6</b>  | 0.6   | <b>88.8</b> | 3.0  | <b>51.5</b>  | 10.6 | <b>34.1</b>  | 11.6 | <b>80.5</b> | 8.1  |
| HvTIP1;2 | <b>0.01</b>  | 0.01  | <b>2.19</b> | 0.49 | <b>11.46</b> | 3.78 | <b>24.08</b> | 9.32 | <b>1.10</b> | 0.55 |
| HvTIP2;1 | <b>LD</b>    |       | <b>LD</b>   |      | <b>LD</b>    |      | <b>LD</b>    |      | <b>LD</b>   |      |
| HvTIP2;2 | <b>LD</b>    |       | <b>LD</b>   |      | <b>LD</b>    |      | <b>LD</b>    |      | <b>LD</b>   |      |
| HvTIP2;3 | <b>2.4</b>   | 0.6   | <b>3.1</b>  | 1.3  | <b>0.3</b>   | 0.2  | <b>1.3</b>   | 1.8  | <b>7.6</b>  | 2.9  |
| HvTIP3;1 | <b>LD</b>    |       | <b>LD</b>   |      | <b>LD</b>    |      | <b>LD</b>    |      | <b>LD</b>   |      |
| HvTIP4;1 | <b>0.038</b> | 0.014 | <b>5.94</b> | 1.6  | <b>36.7</b>  | 7.04 | <b>40.6</b>  | 12.7 | <b>10.8</b> | 5.05 |
| HvTIP5;1 | <b>LD</b>    |       | <b>LD</b>   |      | <b>LD</b>    |      | <b>LD</b>    |      | <b>LD</b>   |      |
| TOTAL    | <b>100</b>   | 0     | <b>100</b>  | 0    | <b>100</b>   | 0    | <b>100</b>   | 0    | <b>100</b>  | 0    |

Percentages were calculated from individual values (n=3 experiments) used to calculate means shown in Table S4c. Those TIP isoforms which make the highest contribution to the total expression of TIPs are highlighted in red; those TIP isoforms which make the second, or, or joint second highest contribution are highlighted in pink; LD, limit of detection or not detectable; EZ, NEZ, EmBL, elongation zone, non-elongation zone and emerged-blade portion of the growing leaf three; L2, Sheath, mature blade and sheath of leaf two.

**Table S4e.** Statistical analysis of differences in expression of barley PIPs between leaf regions

| Gene            | Leaf regions |       |       |         |       |        |          |
|-----------------|--------------|-------|-------|---------|-------|--------|----------|
|                 | EZ:EmBL      | EZ:L2 | EZ:Sh | EmBL:L2 | Sh:L2 | EZ:NEZ | NEZ:EmBL |
| <b>HvPIP1;1</b> | *            | **    | *     |         | *     | **     | *        |
| <b>HvPIP1;2</b> |              |       |       |         |       |        |          |
| <b>HvPIP1;3</b> | *            | **    | **    | (*)     |       | ***    |          |
| <b>HvPIP1;4</b> |              |       |       |         |       |        |          |
| <b>HvPIP1;5</b> | **           | **    | **    | *       | *     | **     | ***      |
| <b>ΣPIP1s</b>   |              | *     |       |         |       | *      |          |
| <b>HvPIP2;1</b> |              | *     | **    |         |       | *      |          |
| <b>HvPIP2;2</b> | **           | **    | **    |         | *     | **     | **       |
| <b>HvPIP2;3</b> | *            | *     | *     | (*)     | *     | *      |          |
| <b>HvPIP2;4</b> | **           | **    | ***   |         |       | **     | *        |
| <b>HvPIP2;5</b> | **           | **    | *     | (*)     | ***   | *      | **       |
| <b>HvPIP2;7</b> | *            | **    | *     |         | **    | *      | *        |
| <b>ΣPIP2s</b>   | **           | **    | *     |         | ***   | *      | *        |

Averaged (across reference genes)  $2^{-(\Delta Ct)}$  values for three batches of plants were used to carry out paired t-test (Excel) of differences in expression between any two leaf regions. EZ, NEZ, EmBL, elongation zone, non-elongation zone and emerged blade portion of the growing leaf three; L2, mature blade of leaf two; Sh, sheath (mature) of leaf two; ΣPIP1s and ΣPIP2s, sum of expression of PIP1s and PIP2s, respectively. Expression of HvPIP1;4 in EZ was near the limit of detection; expression of HvPIP1;2 was mostly close to zero. No statistics were performed for these two genes. Two-factor ANOVA analysis, with replication, showed that leaf regions differed highly significantly ( $p=6.41E-21$ ) in expression.

\*, \*\*, \*\*\* statistically significant difference between leaf regions at  $p < 0.05$ ,  $p < 0.01$  and  $p < 0.001$ ; (\*), just below 0.05 ( $> 0.046$ ); boxes in pink: significantly higher expression in leaf region listed first; boxes in green: significantly higher expression in leaf region listed second.

**Table S4f.** Statistical analysis of differences in expression of TIPs between elongation zone and other leaf regions analysed.

| Gene     | Leaf regions |         |       |           |
|----------|--------------|---------|-------|-----------|
|          | EZ:NEZ       | EZ:EmBL | EZ:L2 | EZ:Sheath |
| HvTIP1;1 | **           | ***     | ***   |           |
| HvTIP1;2 | **           | *       | *     | **        |
| HvTIP2;3 | *            | *       | **    | ***       |
| HvTIP4;1 | **           | *       | *     | *         |
| Σ-TIPs   | **           | ***     | ***   |           |

Averaged (across reference genes)  $2^{-(\Delta Ct)}$  values for three batches of plants were used to carry out paired t-test (Excel) of differences in expression between any two leaf regions. EZ, NEZ, EmBL, elongation zone, non-elongation zone and emerged blade portion of the growing leaf three; L2, mature blade of leaf two; Sh, sheath (mature) of leaf two; ΣTIPs, sum of expression of TIP1s. Those TIPs, which had expression close to the limit of detection, were not considered. Two-factor ANOVA analysis, with replication, showed that leaf regions differed highly significantly ( $p=2.32E-08$ ) in expression.

\*, \*\*, \*\*\* statistically significant difference between leaf regions at  $p < 0.05$ ,  $p < 0.01$  and  $p < 0.001$ ; (\*), just below 0.05 ( $> 0.046$ ); boxes in pink: significantly higher expression in leaf region listed 1<sup>st</sup>; green boxes: significantly higher expression in leaf region listed 2<sup>nd</sup>.

**Table S4g.** Statistical analysis of differences in expression of TIPs between non-elongation zone, emerged blade, mature blade and sheath.

| Gene     | Leaf regions |        |        |         |         |       |
|----------|--------------|--------|--------|---------|---------|-------|
|          | NEZ:EmBL     | NEZ:L2 | NEZ:Sh | EmBL:L2 | EmBL:Sh | L2:Sh |
| HvTIP1;1 | **           | **     |        |         | *       | *     |
| HvTIP1;2 |              | *      | *      |         |         | *     |
| HvTIP2;3 | *            | **     | **     |         | **      | **    |
| HvTIP4;1 |              |        | *      |         |         |       |
| Σ-TIPs   | **           | **     |        |         | *       | *     |

Averaged (across reference genes)  $2^{-(\Delta Ct)}$  values for three batches of plants were used to carry out paired t-test (Excel) of differences in expression between any two leaf regions. EZ, NEZ, EmBL, elongation zone, non-elongation zone and emerged blade portion of the growing leaf three; L2, mature blade of leaf two; Sh, sheath (mature) of leaf two; ΣTIPs, sum of expression of TIP1s. Those TIPs, which had expression close to the limit of detection, were not considered. Two-factor ANOVA analysis, with replication, showed that leaf regions differed highly significantly ( $p=2.32E-08$ ) in expression.

\*, \*\*, \*\*\* statistically significant difference between leaf regions at  $p < 0.05$ ,  $p < 0.01$  and  $p < 0.001$ ; (\*), just below 0.05 ( $> 0.046$ ); boxes in pink: significantly higher expression in leaf region listed first; boxes in green: significantly higher expression in leaf region listed second.



**Table S4h.** Comparison of total expression of PIP1s and PIP2s between leaf regions.

| Compared  | Leaf region |         |       |       |         |       |          |
|-----------|-------------|---------|-------|-------|---------|-------|----------|
|           | EZ:NEZ      | EZ:EmBL | EZ:L2 | EZ:Sh | EmBL:L2 | L2:Sh | NEZ:EmBL |
| PIP1s     | *           |         | *     |       |         |       |          |
| PIP2s     | *           | **      | **    | **    |         | ***   | *        |
| PIP2:PIP1 | *           | *       | **    | *     |         | *     |          |

Pair-wise t-test. \*, \*\*, \*\*\* statistically significant (paired t-test) different between leaf regions at  $p < 0.05$ ,  $p < 0.01$  and  $p < 0.001$ ; (\*); boxes in pink: significantly higher expression in leaf region listed first; boxes in green: significantly higher expression in leaf region listed second, EZ, NEZ, EmBL, elongation zone, non-elongation zone and emerged blade portion of the growing leaf three; L2, mature blade of leaf two; Sh, sheath (mature) of leaf two.

**Table S4i.** Comparison of total expression of PIP1s and PIP2s within leaf regions.

| Compared    | Leaf region |     |      |    |        |
|-------------|-------------|-----|------|----|--------|
|             | EZ          | NEZ | EmBL | L2 | Sheath |
| PIP1s>PIP2s |             |     |      | *  |        |
| PIP2s>PIP1s | *           |     |      |    |        |

Pair-wise t-test. \*, \*\*, \*\*\* statistically significant (paired t-test) different between PIP1s and PIP2s at  $p < 0.05$ ,  $p < 0.01$  and  $p < 0.001$ ; EZ, NEZ, EmBL, elongation zone, non-elongation zone and emerged blade portion of the growing leaf three; L2, mature blade of leaf two; Sh, sheath (mature) of leaf two.

**Table S4j.** Summary of ANOVA analyses of qPCR data, where expression of MIPs was determined in five leaf regions of barley, in three independent experiments.

| ANOVA                       | What was compared                                                                                                                                                                                                                                           | P-value                                                                                                         | Conclusion                                                                                                                                                                                                                       |
|-----------------------------|-------------------------------------------------------------------------------------------------------------------------------------------------------------------------------------------------------------------------------------------------------------|-----------------------------------------------------------------------------------------------------------------|----------------------------------------------------------------------------------------------------------------------------------------------------------------------------------------------------------------------------------|
| Two-factor with replication | $2^{(-\Delta Ct)}$ values of PIPs (sample) from three experiments (n=3) against leaf region (column)                                                                                                                                                        | Sample: 2.6E-68<br>Column: 6.4E-21<br>Interaction: 1.1E-48                                                      | Individual PIP isoforms differ in expression between leaf regions, as do leaf regions in their PIP expression. Clear interaction between leaf region and PIP expression profile                                                  |
| Two-factor with replication | $2^{(-\Delta Ct)}$ values of total expression of PIP1s and PIP2s (sample) from three experiments (n=3) against leaf region (column)                                                                                                                         | Sample: 0.42<br>Column: 2.3E-08<br>Interaction: 1.9E-06                                                         | No basic difference between total expression of PIP1s and PIP2s throughout all leaf regions. Leaf regions differ in total expression of PIP1s and PIP2s. Clear interaction between leaf region and total PIP1 or PIP2 expression |
| Two-factor with replication | $2^{(-\Delta Ct)}$ values of expression of TIP1s analysed (sample) from three experiments (n=3) against leaf region (column). Only HvTIP1;1/1;2/2;3/4;1 considered since other TIPs with expression close to limit of detection in at least one leaf region | Sample: 1.5E-25<br>Column: 5.5E-14<br>Interaction: 2.0E-19                                                      | Individual TIP isoforms differ in expression between leaf regions, as do leaf regions in their TIP expression. Clear interaction between leaf region and TIP expression profile                                                  |
| Single factor               | $2^{(-\Delta Ct)}$ values of HvPIPX;X expression from three experiments (n=3) against leaf region (groups)                                                                                                                                                  | Between groups:<br>1;1: 3.6E-05<br>1;3: 4.5E-05<br>1;5: 2.1E-07<br>2;1: 2.3E-03<br>2;2: 3.6E-07<br>2;3: 1.1E-02 | Significant difference in expression of particular PIP between leaf regions. HvPIP1;2 and HvPIP1;4 not tested since expression at                                                                                                |

|               |                                                                                                                                          |                                                                                                                                                                                                                            |                                                                                                                                  |
|---------------|------------------------------------------------------------------------------------------------------------------------------------------|----------------------------------------------------------------------------------------------------------------------------------------------------------------------------------------------------------------------------|----------------------------------------------------------------------------------------------------------------------------------|
|               |                                                                                                                                          | 2;4: 1.3E-06<br>2;5: 5.9E-07<br>2;7: 1.9E-05                                                                                                                                                                               | limit of detection in at least one leaf region                                                                                   |
| Single factor | Leaf region against $2^{(-\Delta Ct)}$ expression values of all members of the PIP1 or PIP2 family from three experiments (n=3) (groups) | Between groups:<br>EZ/PIP1: 1.9E-07<br>EZ/PIP2: 3.8E-09<br>NEZ/PIP1: 2.5E-06<br>NEZ/PIP2: 7.2E-10<br>EB/PIP1: 4.7E-04<br>EB/PIP2: 1.1E-09<br>L2/PIP1: 6.5E-07<br>L2/PIP2: 1.2 E-08<br>Sh/PIP1: 5.7E-07<br>Sh/PIP2: 4.3E-15 | In all leaf regions tested, there is a significant difference in expression among individual members of the PIP1 and PIP2 family |

EZ, NEZ, EB, elongation zone, non-elongation zone and emerged blade portion of the growing leaf three; L2, mature blade of leaf two; Sh, sheath (mature) of leaf two.

## Supplementary File S5

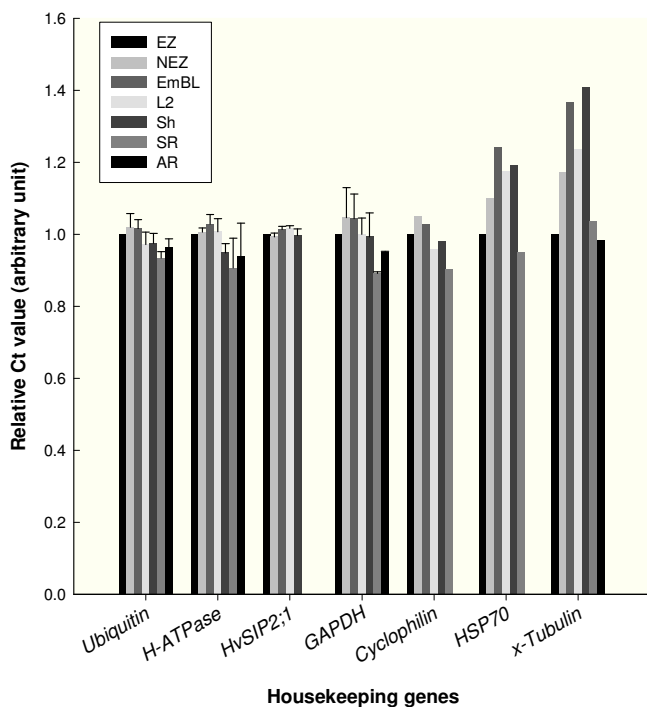

**Fig. S5.** Real-time (qPCR) expression analyses of housekeeping genes in leaf and root regions of barley. The elongation zone (EZ), adjacent non-elongation zone (NEZ) and emerged-blade portion (EmBL) of the growing leaf three was analysed, together with the blade and sheath of the mature leaf two (L2 and Sh, respectively). In addition, entire seminal roots (SR) and adventitious roots (AR) were analysed. Expression (Ct values) of genes in a particular leaf region or type of root was related to the expression in the leaf elongation zone (set to 1.0). Results for ubiquitin, H-ATPase, HvSIP2;1 and GAPDH are averages  $\pm$  SD (error bars) of the analyses of three batches of plants. For cyclophilin, HSP70 and alpha-tubulin only two batches of plants were analysed (no SD).
